# Supplementary material
Source: publisher figshare collection journal article supplement (https://tandf.figshare.com/ndownloader/files/29087393)
Supplement: Supplementary file 1 [file 29087393]

**SUPPLEMENTARY INFORMATION**

**for**

**The absolute configuration of 2-bromo-2,3-dihydro-1H-inden-1-ols**

**Dmitry V. Prysiazhnuk, Eduard B. Rusanov, Oleg I. Kolodiazhnyi***

*V.P. Kukhar Institute of Bioorganic Chemistry and Petrochemistry of the NAS of Ukraine, Kyiv.*

**Table of Contents**

**Experimental Section …...….............................….............….…………………… S2-S6**

**Copies of 1H and 13C NMR Spectra …...…......….............….…………………… S7-S24**

**References …...….......…..............…........................................…………………… S25**

1. ***General information***

1H (500MHz) and 13C (125 MHz) NMR spectra were recorded on Bruker Avance DRX 500 spectrometer in dimethylsulfoxide (DMSO-d6) solution with tetramethylsilane (TMS) as an internal standard. Unless otherwise specified NMR spectra have been made in CDCl3 Chemical shifts (G) of 1 H and 13C are reported in ppm relative to CHCl3 (G = 7.26 for 1H and G = 77.0 for 13C). J values are given in Hz. Proton (1H) NMR information is given in the following format: multiplicity (s, singlet; d, doublet; t, triplet; q, quartet; sept; septet; m, multiplet, b, broad), coupling constant J, number of protons). Melting points were measured with a Buechi melting-point apparatus and are uncorrected.. The chromatomass spectra were recorded on an Agilent 1100 Series high-performance liquid chromatograph equipped with a diode matrix with an Agilent LCnMSD SL mass selective detector, allowing fast switching of the ionization modes. The GC-MS studies were performed using device Agilent Technologies 1200. The HPLC was performed with chiral column Chiralcel OJ-H (250*4,6 mm, 5 mkm with Selector Celulose tris(4-methylbenzoate) coated on 5 m silicagel. The reaction progress was monitored by thin-layer chromatography (TLC) on silica gel 60F254 Merck and visualized under ultraviolet light (254 and 366 nm), or through spraying with 5% phosphomolybdic acid in EtOH, H2SO4 acidified by Anise aldehyde solution in EtOH or by placing in iodine vapor. Flash chromatography was performed with Merck silica gel 60 (230-400 mesh). The most part of reactants were obtained from commercially available source (Aldrich) and used without further purification. All solvents were purified by standard procedures or obtained from a Solvent Purification System (Braun SPS 800). Unless otherwise mentioned, all reactions were carried out under an atmosphere of dry argon.

**(*Rac*)-*Cis*-*2-bromo-2,3-dihydro-1H-inden-1-ol, (1R,2S + 1S,2R)-*1**

**a)** To a solution of racemic *trans*-**2** (2 g, 0.0094 mol) in anhydrous dichloromethane (30 ml) was added the Dess-Martin periodate (4.4 g, 0.014 mol) at room temperature. The reaction mixture was stirred for 15 h at room temperature on a magnetic stirrer. The product was washed with a Na2S2O3 solution, then with water, dried over Na2SO4, filtered and concentrated under reduced pressure to give the 2-bromo-2,3-dihydro-1H-inden-1-one (1.6 g, 81%) as a white solid, m.p. 35-40 0C (lit. 37–38 0C [1,2]).

1Н NMR, (CDCl3), , ppm (J, Hz): Н 3.19 (dd, J 18.1, 3.2 Hz, 1H), 3.84 (dd, J 18.1, 7.5 Hz, 1H), 4.65 (dd, J 7.5, 3.2 Hz, 1H), 7.40-7.55 (m, 3Н), 7.88-7.94 (m, 1H).

**b)** To a solution of bromindanone **3** (2 g, 0.0093 mol) in methanol (40 ml), was added sodium borohydride (0.18 g, 0.00476 mol) with cooling, and the mixture was stirred for 4 hours at room temperature. Then ammonium chloride (0.39 g, 0.0072 mol) was added, the solvent was evaporated, 20 ml of water was added and the product was extracted with dichloromethane. After that the organic phase was separated, dried over Na2SO4, filtered and concentrated under reduced pressure to give the titled compound (1*S*,2*R*+1*R*,2*S*)-**1** (1.9 g, 96%), m.p. 110-111 0C (hexane).

1Н NMR, (CDCl3), , ppm (*J*, Hz): Н 2.4 (br, 1H, OH); 3.33-3.43 (m, 2H, CH2), 4.8-4.84 (m, 1H, CHBr), 4.9 (dd, *J* 7.5 Hz, 3.5 Hz, 1H, CHOH), 7.22-7.31 (m, 3Н, CH(Ar)), 7.40-7.43 (m, 1H, CH(Ar)).

13C NMR, (CDCl3), , ppm (*J*, Hz): C 40.20, 60.81, 76.25, 124.60, 125.02, 127.55, 128.73, 139.21, 141.60.

Anal. calcd. for C9H9BrO: C, 50.73; H, 4.26; Br, 37.50. Found: C, 51.05; H, 4.48; Br, 37.16.

***(Rac)-Trans-2-bromo-2,3-dihydro-1H-inden-1-ol*, (1*R*,2*R* +1*S,2S*)-2**

To a solution of 1H-indene **1** (5 g, 0.043 mol) in dioxane (25 ml) was added an aqueous solution of KBr/KBrO3 (water (200 ml), KBr (7.17g, 0.0603 mol), KBrO3 (5.03 g, 0.0301 mol)) at room temperature. Then, at room temperature, H2SO4 (4.614 g, 0.047 mol) was added over 1-2 hours. Then the mixture was left at stirring for 4 hours. The product was extracted with dichloromethane (3 times), the organic layer was washed with saturated NaCl solution, dried with Na2SO4, and evaporated. Yield: 6.9 g (75%), m.p. 110 0С (lit. m.p. 110-111 0C.[2,3]).

1Н NMR, (CDCl3), , ppm (J, Hz): Н 2.1 (br, 1H, OH); 3.22 (dd, 1Н, CH), 3.56 (dd,1H, CH), 4.25 (q, 1H, CHOH,), 5.3 (d, 1H. CHBr,), 7.24-7.28 (m, 3H, CH(Ar)), 7.43-7.45 (m, 1H, CH(Ar)) [2,3].

***(1S,2R)-2-bromo-2,3-dihydro-1H-inden-1-ol, (1S,2R)-1****.*

To a solution of (*rac*)-*сis*-2-bromo-2,3-dihydro-1H-inden-1-ol **1** (2g, 0.0094 mol) in MTBE (20 ml), Novozym 435 lipase (0.4g) and isopropenyl acetate (2 ml) were added. The reaction mixture was magnetically stirred at 50 °C. The progress of reaction was monitored by NMR spectroscopy. The reaction was stopped at the conversion of 50%. Novozym 435 was filtered off, the mother solution was evaporated. The residue consisted of 50:50 mixture of unreacted alcohol and acetate. The residue was separated by chromatography on a silica gel column with eluent of hexane-ethyl acetate (gradient from 20 : 1 to 1 : 1). Two fractions were obtained. In the first fraction the (1*R*,2*S*)-2*-bromo-2,3-dihydro-1H-inden-1-ol acetate* **3** was obtained in yield 45% as a colorless viscous liquid. The acetate **3** was used in the next step of synthesis as initial compound without additional purification

1Н NMR, (CDCl3), , ppm (J, Hz): H 2.21 (s 3Н, CH3O), 3.38 (dd 2Н, CH2), 4.57 (q, 1Н, CHBr), 5.79 (d, 1H, CHOH), 7.26-7.40 (m, 4H, C6H4).

The second fraction contained the (*1S,2R)-2-bromo-2,3-dihydro-1H-inden-1-ol*. For isolation of *(1S,2R)-1*the solvent was evaporated and residue was recrystallized in hexane.

Yield 45%, m.p. 102 0C (hexan), []D20=61.6 (C=0.62, CHCl3)); *ee* >98% (MTPA derivative.

1Н NMR, (CDCl3), , ppm (*J*, Hz): Н 2.45 (br, 1H, OH), 3.34 (dd, 1H, *J* = 16.8 Hz, *J*=3.2 Hz, CH), 3.44 (dd, 1H, *J* = 16.8 Hz, 5.0 Hz, CH), 4.90-4.92 (m, 1H, CHBr), 4.96 (d, *J* = 3.5 Hz, 1H, CHOH), 7.23-7.45 (m, 4H, H(Ar)).

13C NMR , (CDCl3), , ppm (*J*, Hz): C 40.21, 54.50, 83.0, 124.9, 125.3,127.8, 129.0, 139.5, 141.9.

GC/MS: found *m/z* 212.00 (M) +; 213.98 (M+2) +

Anal. calcd. for C9H9BrO: C, 50.73; H, 4.26; Br, 37.50. Found: C, 50.95; H, 4.38; Br, 37.21.

*(****1R,2S)-2-bromo-2,3-dihydro-1H-inden-1-ol,*** *(****1R,2S)-1***

The (1*R*,2*S*)-2-bromo-2,3-dihydro-1H-inden-1-ol acetate (1*R*,2*S*)-**3** (1 g, 0.0039 mol) **was** dissolved in 10 ml of methanol and the potassium carbonate (1.08 g, 0.0078 mol) was added. The reaction mixture was magnetically stirred for 4 h at room temperature. Then the lipase was filtered off and the mother solution was evaporated, diluted with water and extracted with dichloromethane. The organic phase was separated, and dried with anhydrous sodium sulfate, filtered off and evaporated. As a result 0.75 g of the titled product (1*R*, 2*S*)-**1** was obtained and additionally purified by crystallization in hexane.

Yield: 45%. M.p. 113 0С, []D20 =+53.13 (С=0.8, CHCl3). *ee* >94% (MTPA derivative).

1Н NMR, (CDCl3), , ppm (*J*, Hz): Н 2.30 (br 1H, OH), 3.34 (dd, 1H, *J* = 16.8, 3.2 Hz, CH2), 3.44 (dd, *J* = 16.8 Hz, *J*=3.5 Hz, 1H, CH2), 4.90 (m, 1H, CHBr), 4.96 (dd, *J* =9.6 Hz, 1H, 3.5 Hz, CHOH), 7.24-7.43 (m, 4H, C6H4).

13C NMR, (CDCl3), , ppm (*J*, Hz): C 40.21, 60.79, 76.26, 124.6, 125.0, 127.5, 128.7, 139.2, 141.65.

GC/MS: found *m/z* 211.98 (M+); 213.99 (M++2).

Anal. calcd. for C9H9BrO: C, 50.73; H, 4.26; Br, 37.50. Found: C, 50.95; H, 4.38; Br, 37.21.

***(1S,2S)-2-bromo-2,3-dihydro-1H-inden-1-ol, (1S,2S)-2***

To a solution of 2 g (0.0094 mol) of racemate 2 in MTBE (20 ml) the lipase Novozym 435 (0.4 g) and the isopropenyl acetate (2 ml) were added and the mixture was magnetically stirred at 50 °C. The course of reaction was monitored by NMR spectroscopy. When a conversion of 50% was reached, Novozym 435 was filtered off, the solvent was evaporated. In the residue was detected the mixture of unreacted alcohol (1*S*,2*S*)-**2** and acetate (1*R*,2*R*)-**3**. The alcohol and acetate were separated by column chromatography with silica gel (eluent: hexane-ethyl acetate with gradient from 20 : 1 to 1 : 1). Yield 1 g (43%), m.p. 112-113 °C (lit. m.p. 113 °C).[2]

[]D20 = +63.23 (C=0.53, EtOH). [5]

1Н NMR, (CDCl3), , ppm (*J*, Hz): Н = 2.41 (d, *J* = 5.4 Hz, 1H, OH), 3.22 (dd, *J* = 16.2, 7.5 Hz, 1H, CH2), 3.58 (1H, dd, *J* = 16.1 Hz, 7.0 Hz, CH2), 4.25-4.30 (m, 1H, CHBr), 5.32 (1H, d, *J* = 7.5 Hz, CHOH), 7.22–7.32 (m, 3H, H(Ar)), 7.40-7.43 (m, 1H, H(Ar)).

13C NMR, (CDCl3), , ppm (*J*, Hz): C 0.47, 54.50, 83.40, 124.08, 124.57, 127.63, 129.00, 139.73, 141.64.

Anal. calcd. for C9H9BrO: C, 50.73; H, 4.26; Br, 37.50. Found: C, 50.95; H, 4.38; Br, 37.21.

***(1R,2R)-2-bromo-2,3-dihydro-1H-inden-1-ol,.(1R,2R)-2***

The (1*R*,2*R*)-2-bromo-2,3-dihydro-1H-inden-1-yl acetate (1*R*,2*R*)-3 was obtained after chromatography separation in the previous experiment as a colorless viscous liquid. Yield: 1 gr (45%). []D30 168.5 (C=4.8, EtOH) (lit. []D20 167.5, EtOH) [4].

1Н NMR, (CDCl3), , ppm (*J*, Hz): Н 2.11 (3H, s, CH3), 3.28 (dd, *J*=16.8 Hz, 4.5 Hz, lH, CH2), 3.72 (lH, dd, *J*=17.1, *J*=6.7 Hz, CH2), 4.28-4.30 (m, IH, CHBr), 6.31-6.34 (d, *J*=3.5 Hz, IH, CHOH), 7.19-7.42 (m, 4H, H(Ar)).

The potassium carbonate (1.08 g, 0.0078 mol) was added to a solution of acetate (1R,2R)-3 (1 g, 0.0039 mol) in methanol (10 ml), and the mixture was magnetically stirred for 4 hr at room temperature. The reaction mixture was filtered, the mother solution was evaporated, extracted with dichloromethane/hexane, the organic layer was dried with sodium sulfate, and evaporated to give 0.75 g of (1*R*,2*R*)-2-bromo-2,3-dihydro-1H-inden-1, which was additionally recrystallized in hexane. Yield 90%. M.p. 115-116 0C (hexane). Lit. m.p. 116-118°C.[6] []D20 = 61.57 (C 0.53, ethanol). Lit. []D20 57.8, EtOH). [6]

1Н NMR, (CDCl3), , ppm (*J*, Hz): Н 2.43 (lH, br, OH), 3.23 (lH, dd, *J*=16.2 Hz, 7.8 Hz, CH2), 3.58 (lH, dd, *J*=16.1 Hz, 7.0 Hz, CH2), 4.28-4.30 (m, lH, CHBr), 5.32 (d, *J*=7.5 Hz, lH, CHOH), 7.21-7.40 (4H, m, H(Ar).[6]

13C NMR, (CDCl3), , ppm (J, Hz): C 40.48; 54.47; 83.33; 124.12; 124.54; 127.60; 128.47; 139.73; 141.63.

Anal. calcd. for C9H9BrO: C, 50.73; H, 4.26; Br, 37.50. Found: C, 50.95; H, 4.38; Br, 37.21.

***MTPA Determination of optical purity of resolved stereoisomers of 2,1-bromindanols***

a) To 10 mg (4.7 mmol) of racemic 2,1-bromoindanol and 0.01 ml of triethylamine in 2 ml of diethyl ether was added 13 mg (5.17 mmol) of Mosher acid chloride in the solution of 1 ml of diethyl ether with stirring and cooling to 20 °C. After 10 min, the reaction mixture was centrifuged; the solvent was evaporated in vacuo. 1 ml of CDCl3 was added to the residue, the solution was placed to NMR tube, 1H and 19F NMR spectroscopic analyses were performed (See NMR spectra below).

b) The resolved 2-bromo-2,3-dihydro-1H-inden-1-ol stereoisomers were analyzed analogously (See NMR spectra below)

***X-Ray Structure Determination***

All crystallographic measurements were performed at 173К on a Bruker Smart Apex II diffractometer operating in the ω scans mode. The intensity data were collected using Mo-Kα radiation (λ=0.71078 Å). The structures were solved by direct methods and refined by the full-matrix least-squares technique in the anisotropic approximation for non-hydrogen atoms using the Bruker SHELXTL program package. All CH hydrogen atoms were placed at calculated positions and refined as ‘riding’ model and H-atoms supporting oxygen atoms were found from DF synthesis and refined isotropically. Full crystallographic data were deposited with the Cambridge Crystallographic Data Centre (CCDC No. 2075405 and 2075406).


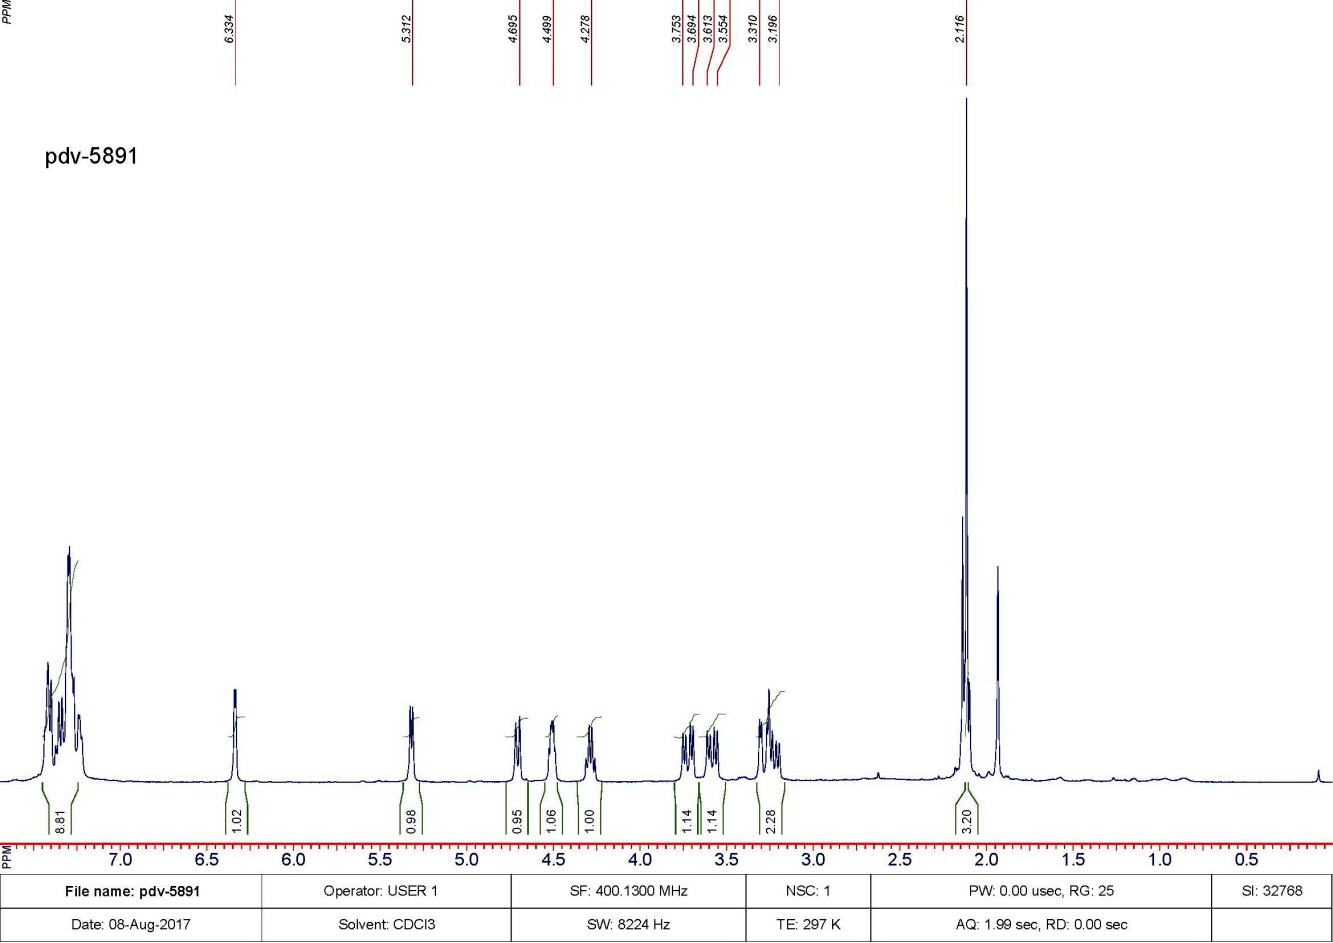


Resolved mixture of (1*R*,2*R*)-2-bromo-2,3-dihydro-1H-inden-1-yl acetate and (1*S*,2*S*)-2-bromo-2,3-dihydro-1H-inden-1-ol


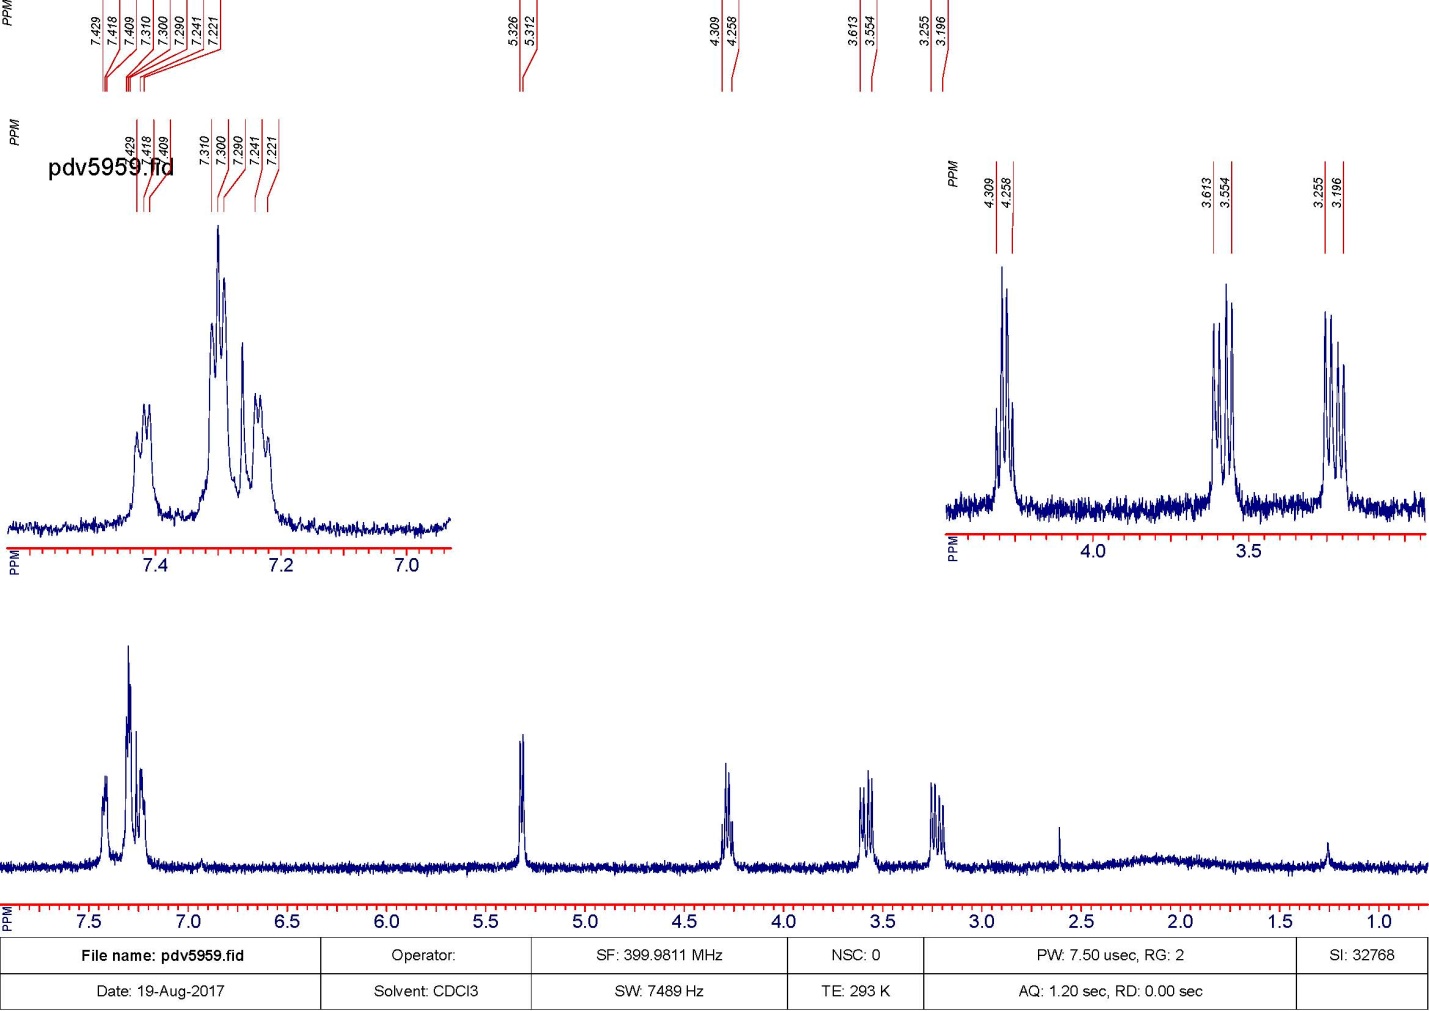


1H spectrum of (1*R*,2*R*)-2-bromo-2,3-dihydro-1H-inden-1-ol

**
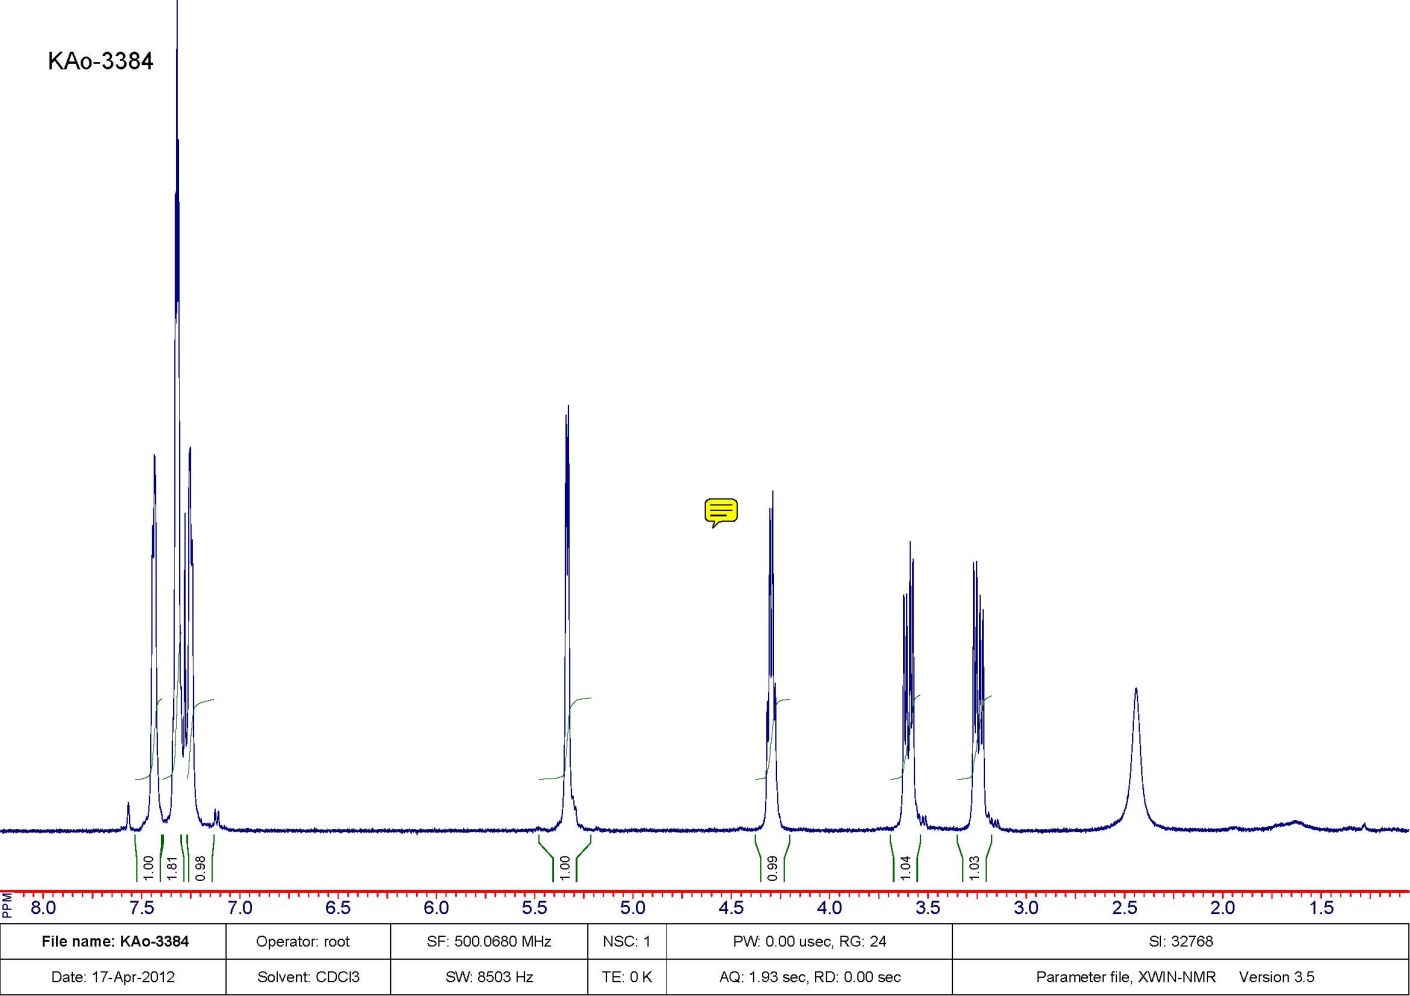
**

1H NMR spectrum of (1*S*,2*S*)-2-bromo-2,3-dihydro-1H-inden-1-ol


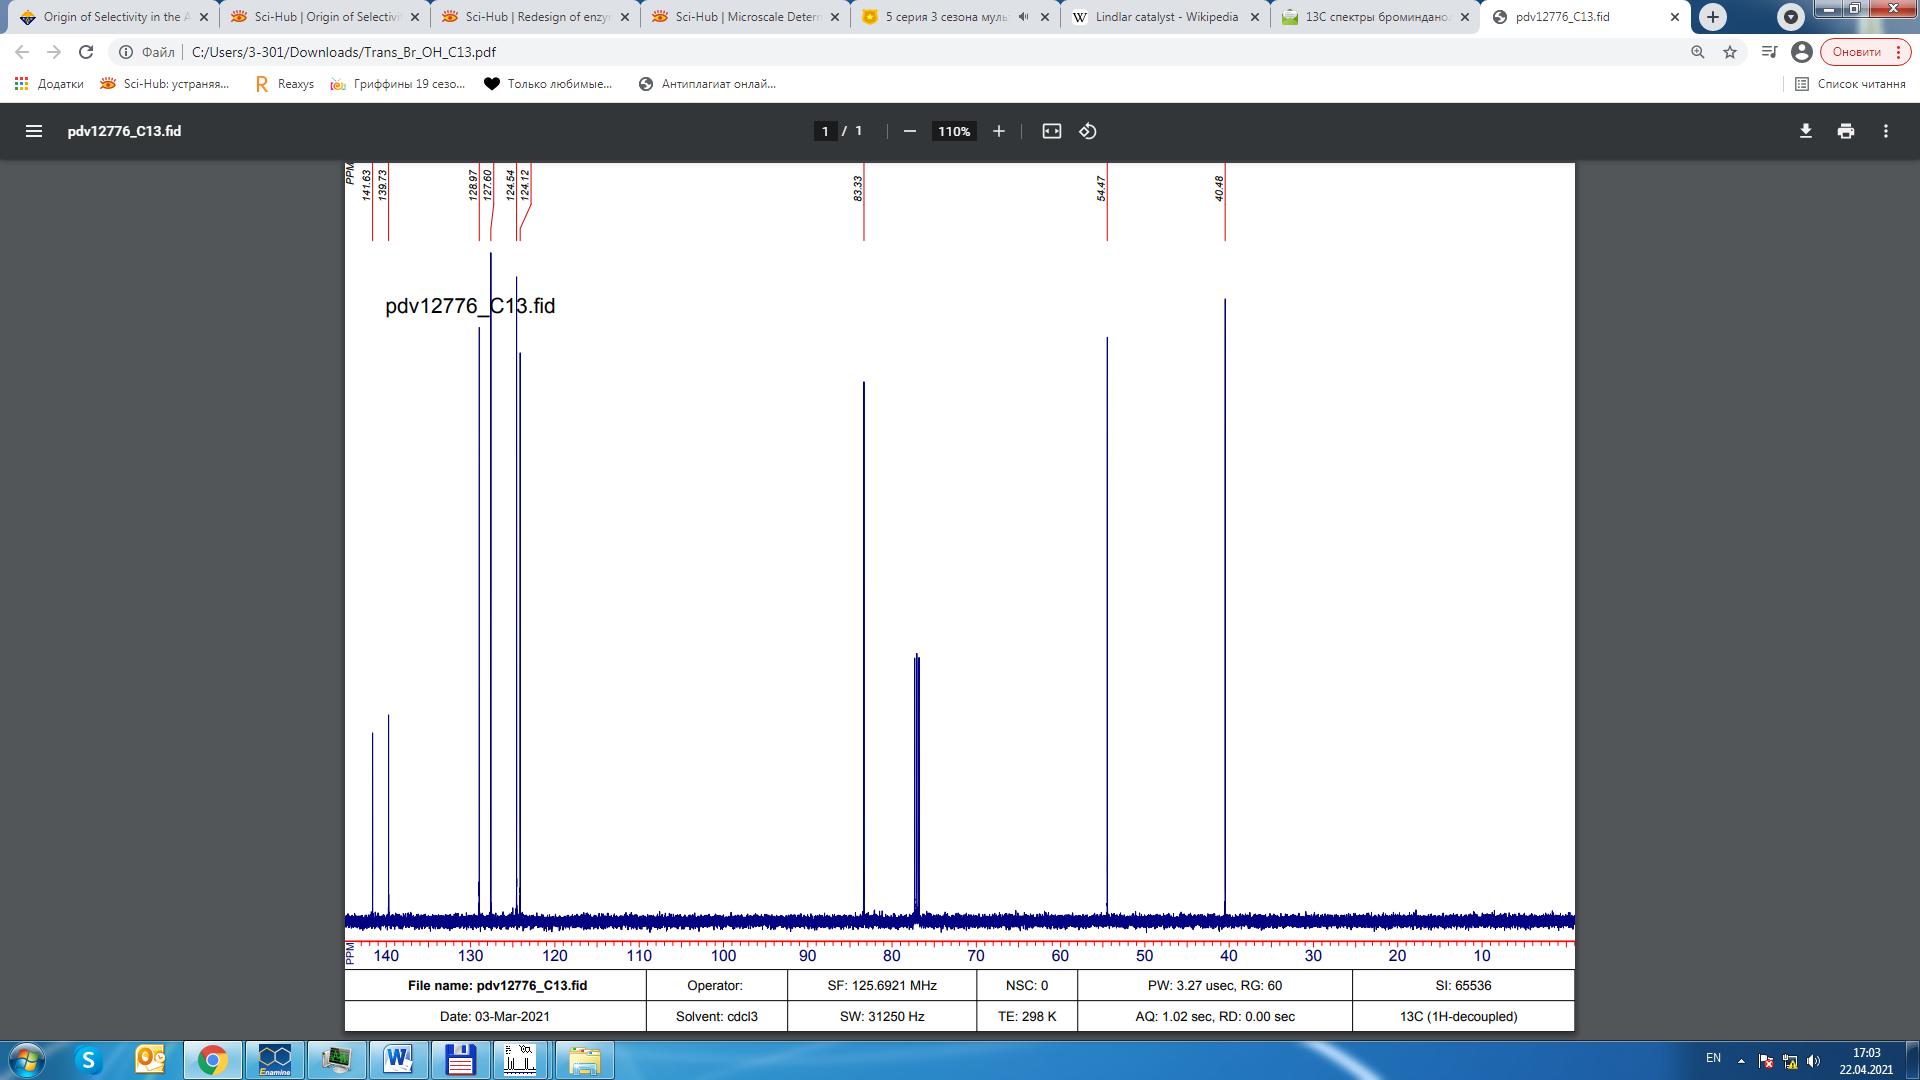


13C NMR spectrum of trans-(1R,2R)-2-bromo-2,3-dihydro-1H-inden-1-ol


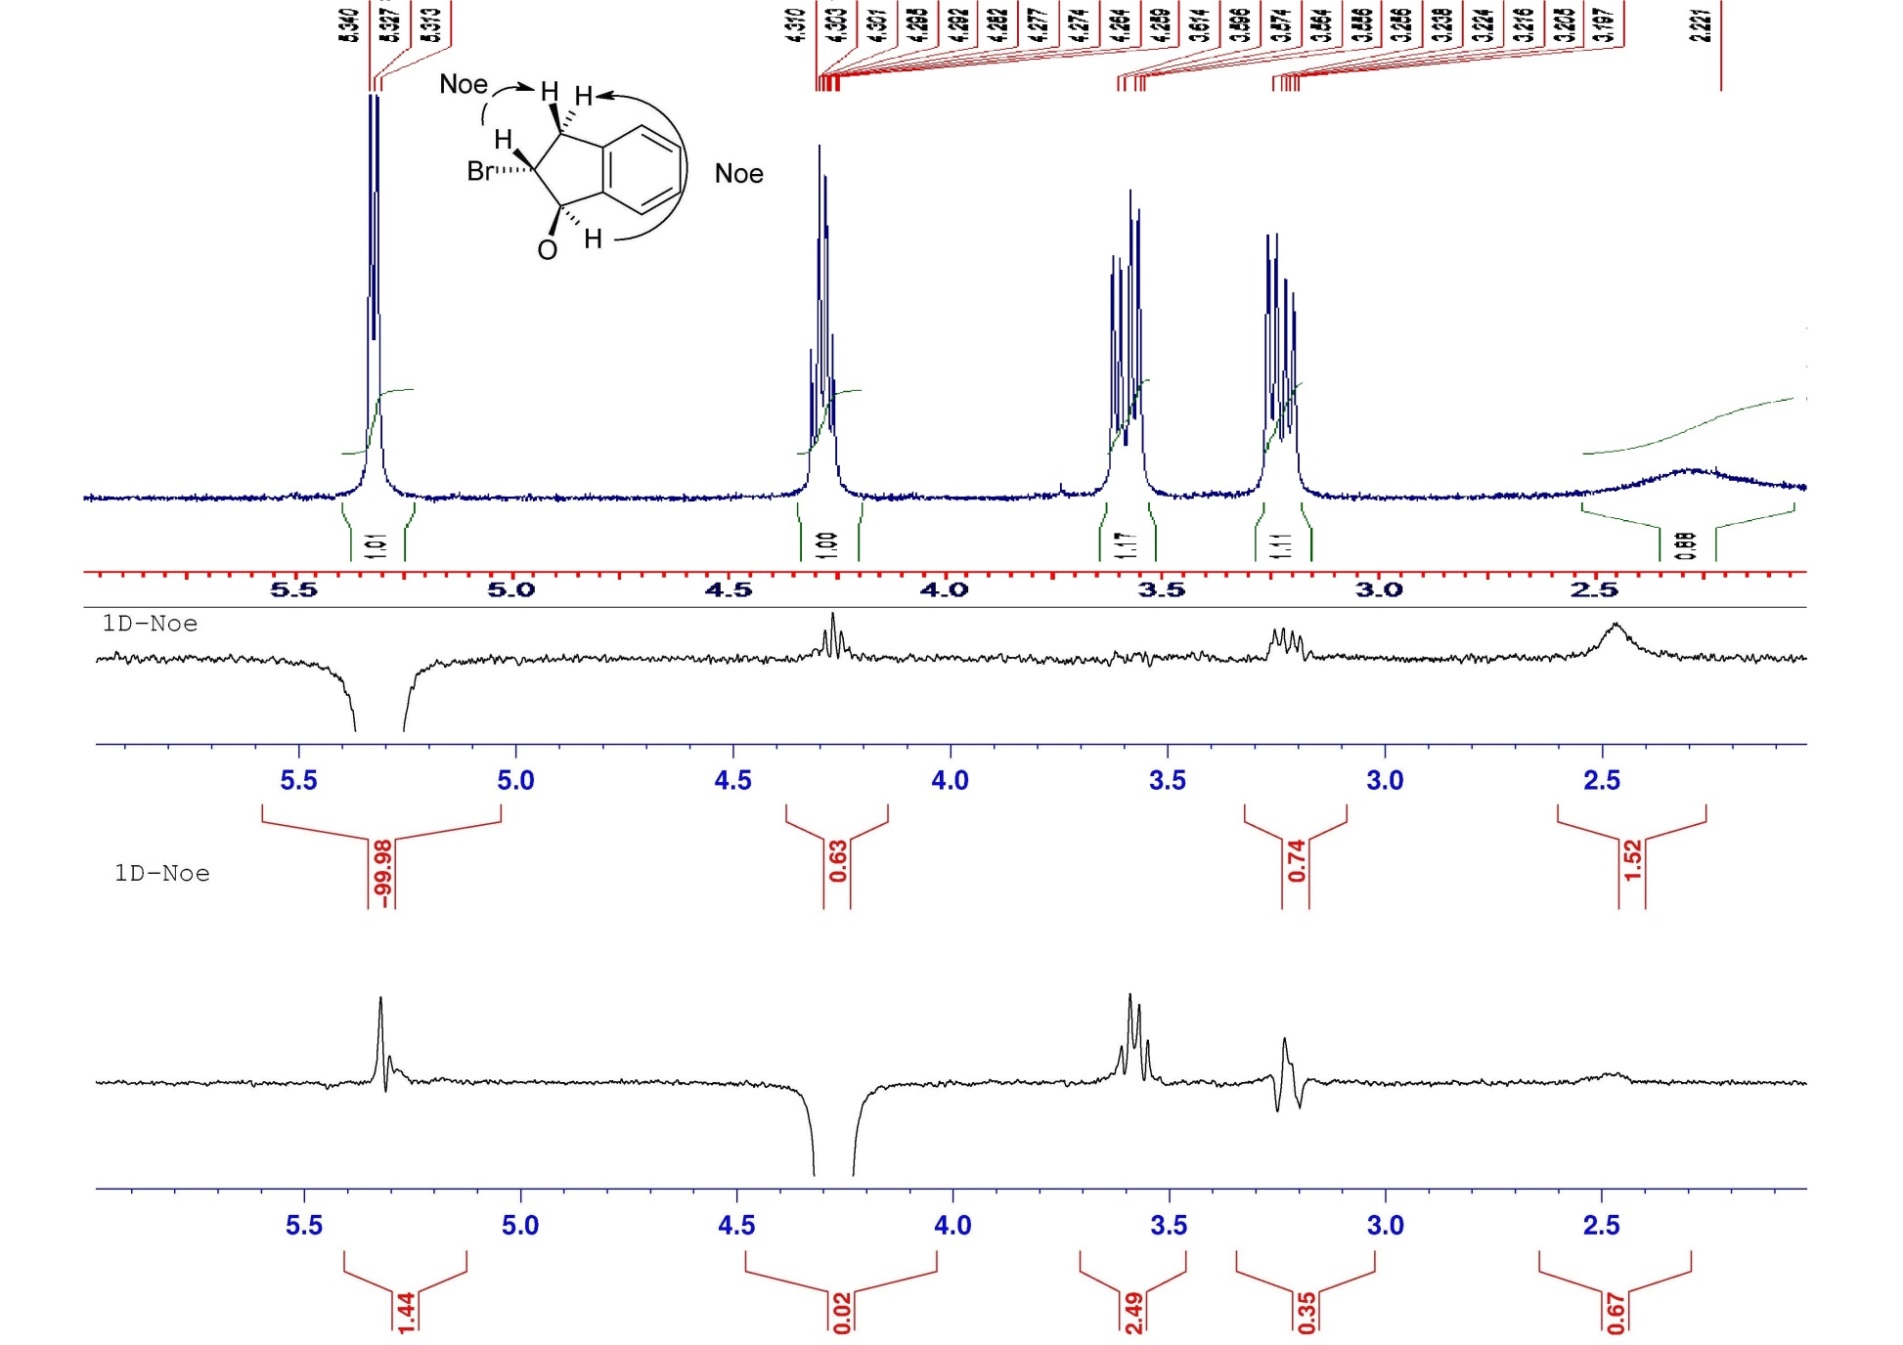


1H{1H}-NOE Experement of (1*S*,2*R*)-2-bromo-2,3-dihydro-1H-inden-1-ol


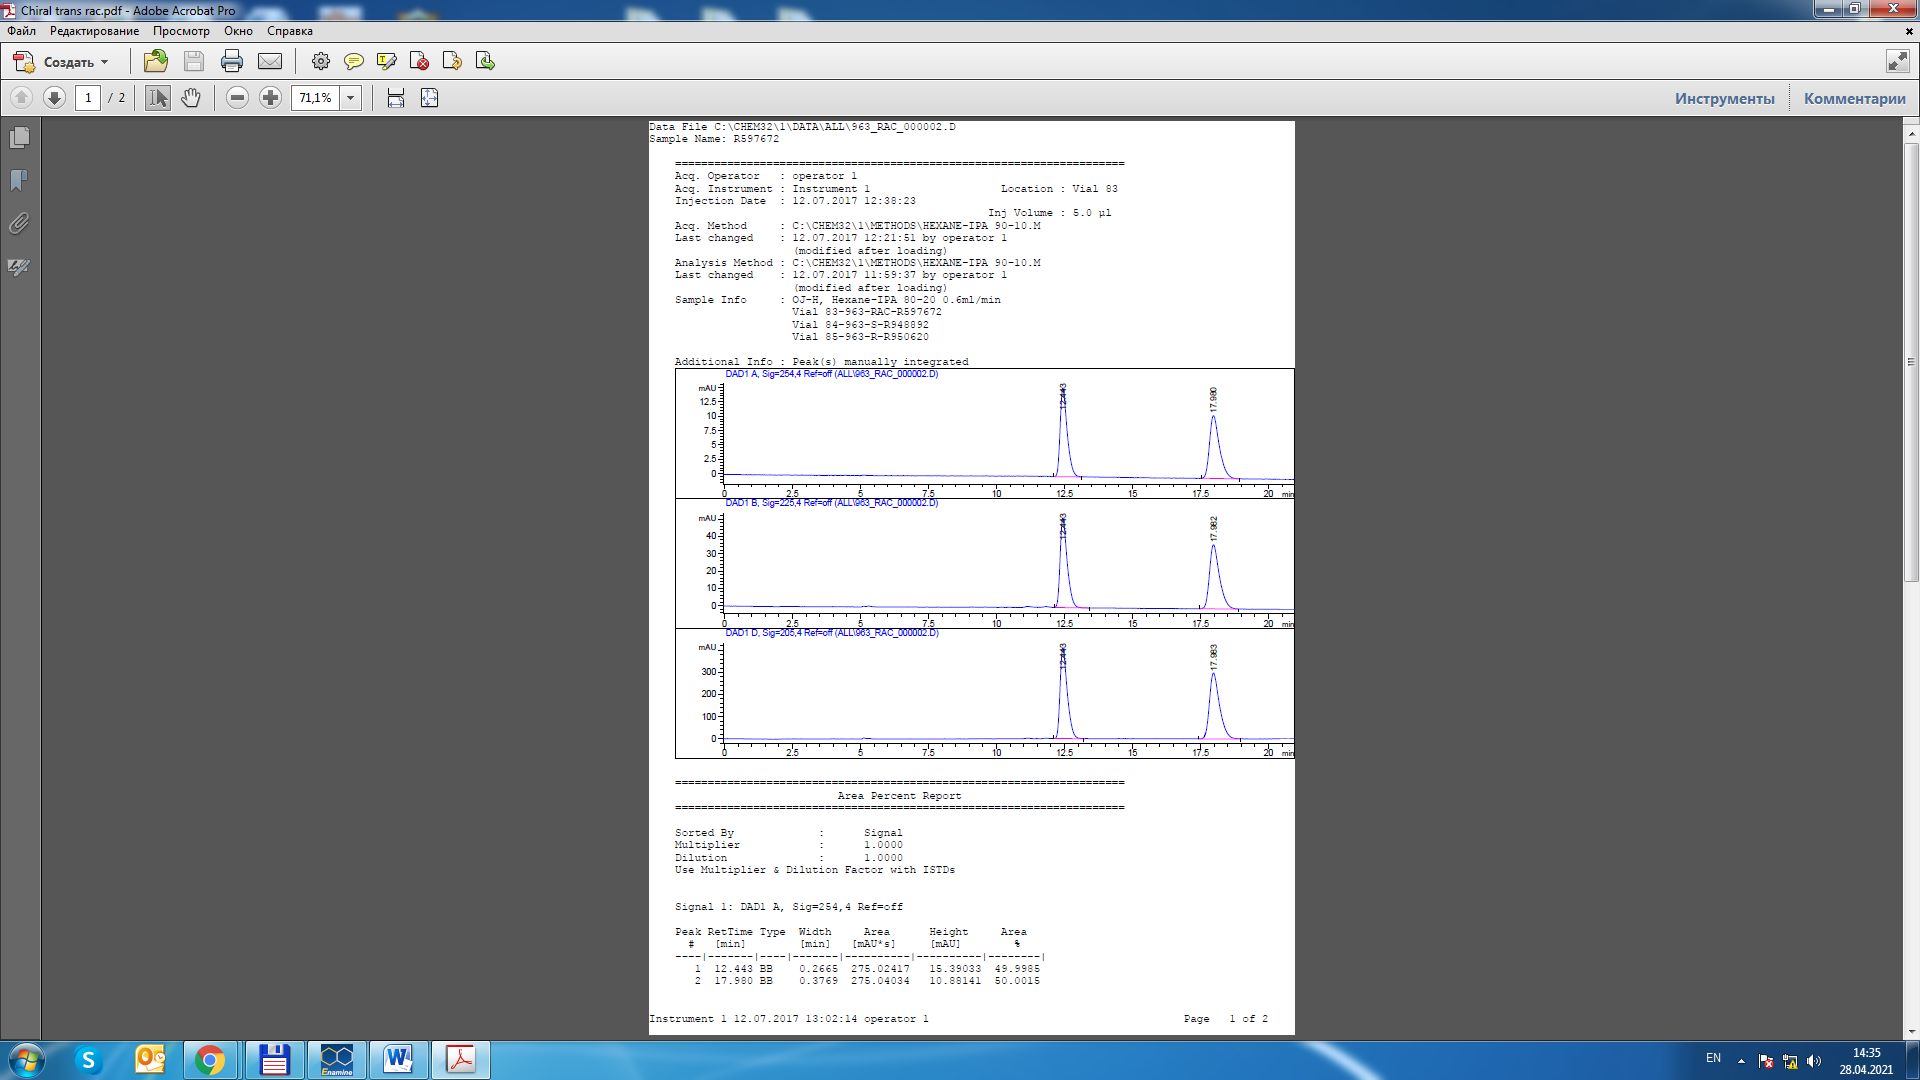


Chromatogram of racemic (*trans)-*2-bromo-2,3-dihydro-1H-inden-1-ol


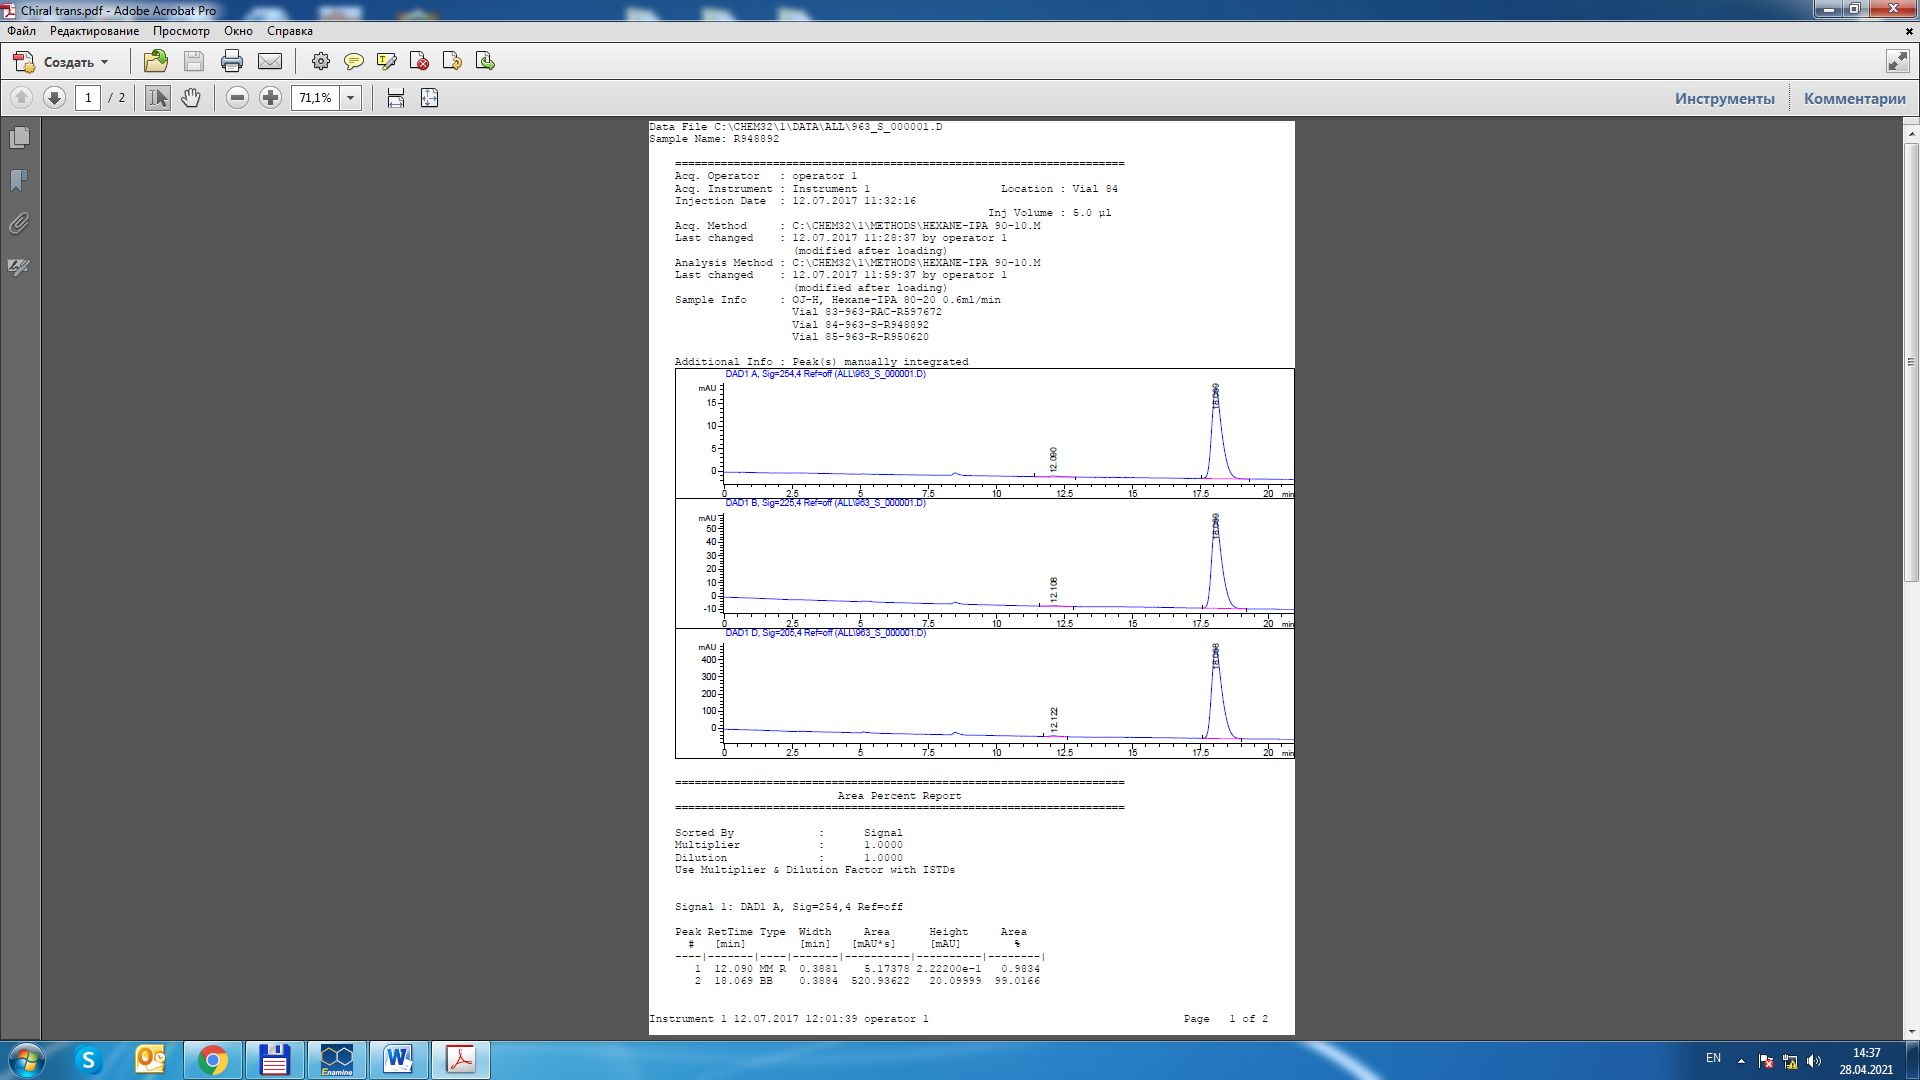


Chromatogram of enantiopure (1*S*,2*R*)-2-bromo-2,3-dihydro-1H-inden-1-ol (chiral column Chiralcel OJ-H (250*4,6 mm, with Selector Celulose tris(4-methylbenzoate) coated on 5 m silicagel))

Chromatogram of enantiopure (1*R*,2*S*)-2-bromo-2,3-dihydro-1H-inden-1-ol (chiral column Chiralcel OJ-H (250*4,6 mm, with Selector Celulose tris(4-methylbenzoate) coated on 5 m silicagel))


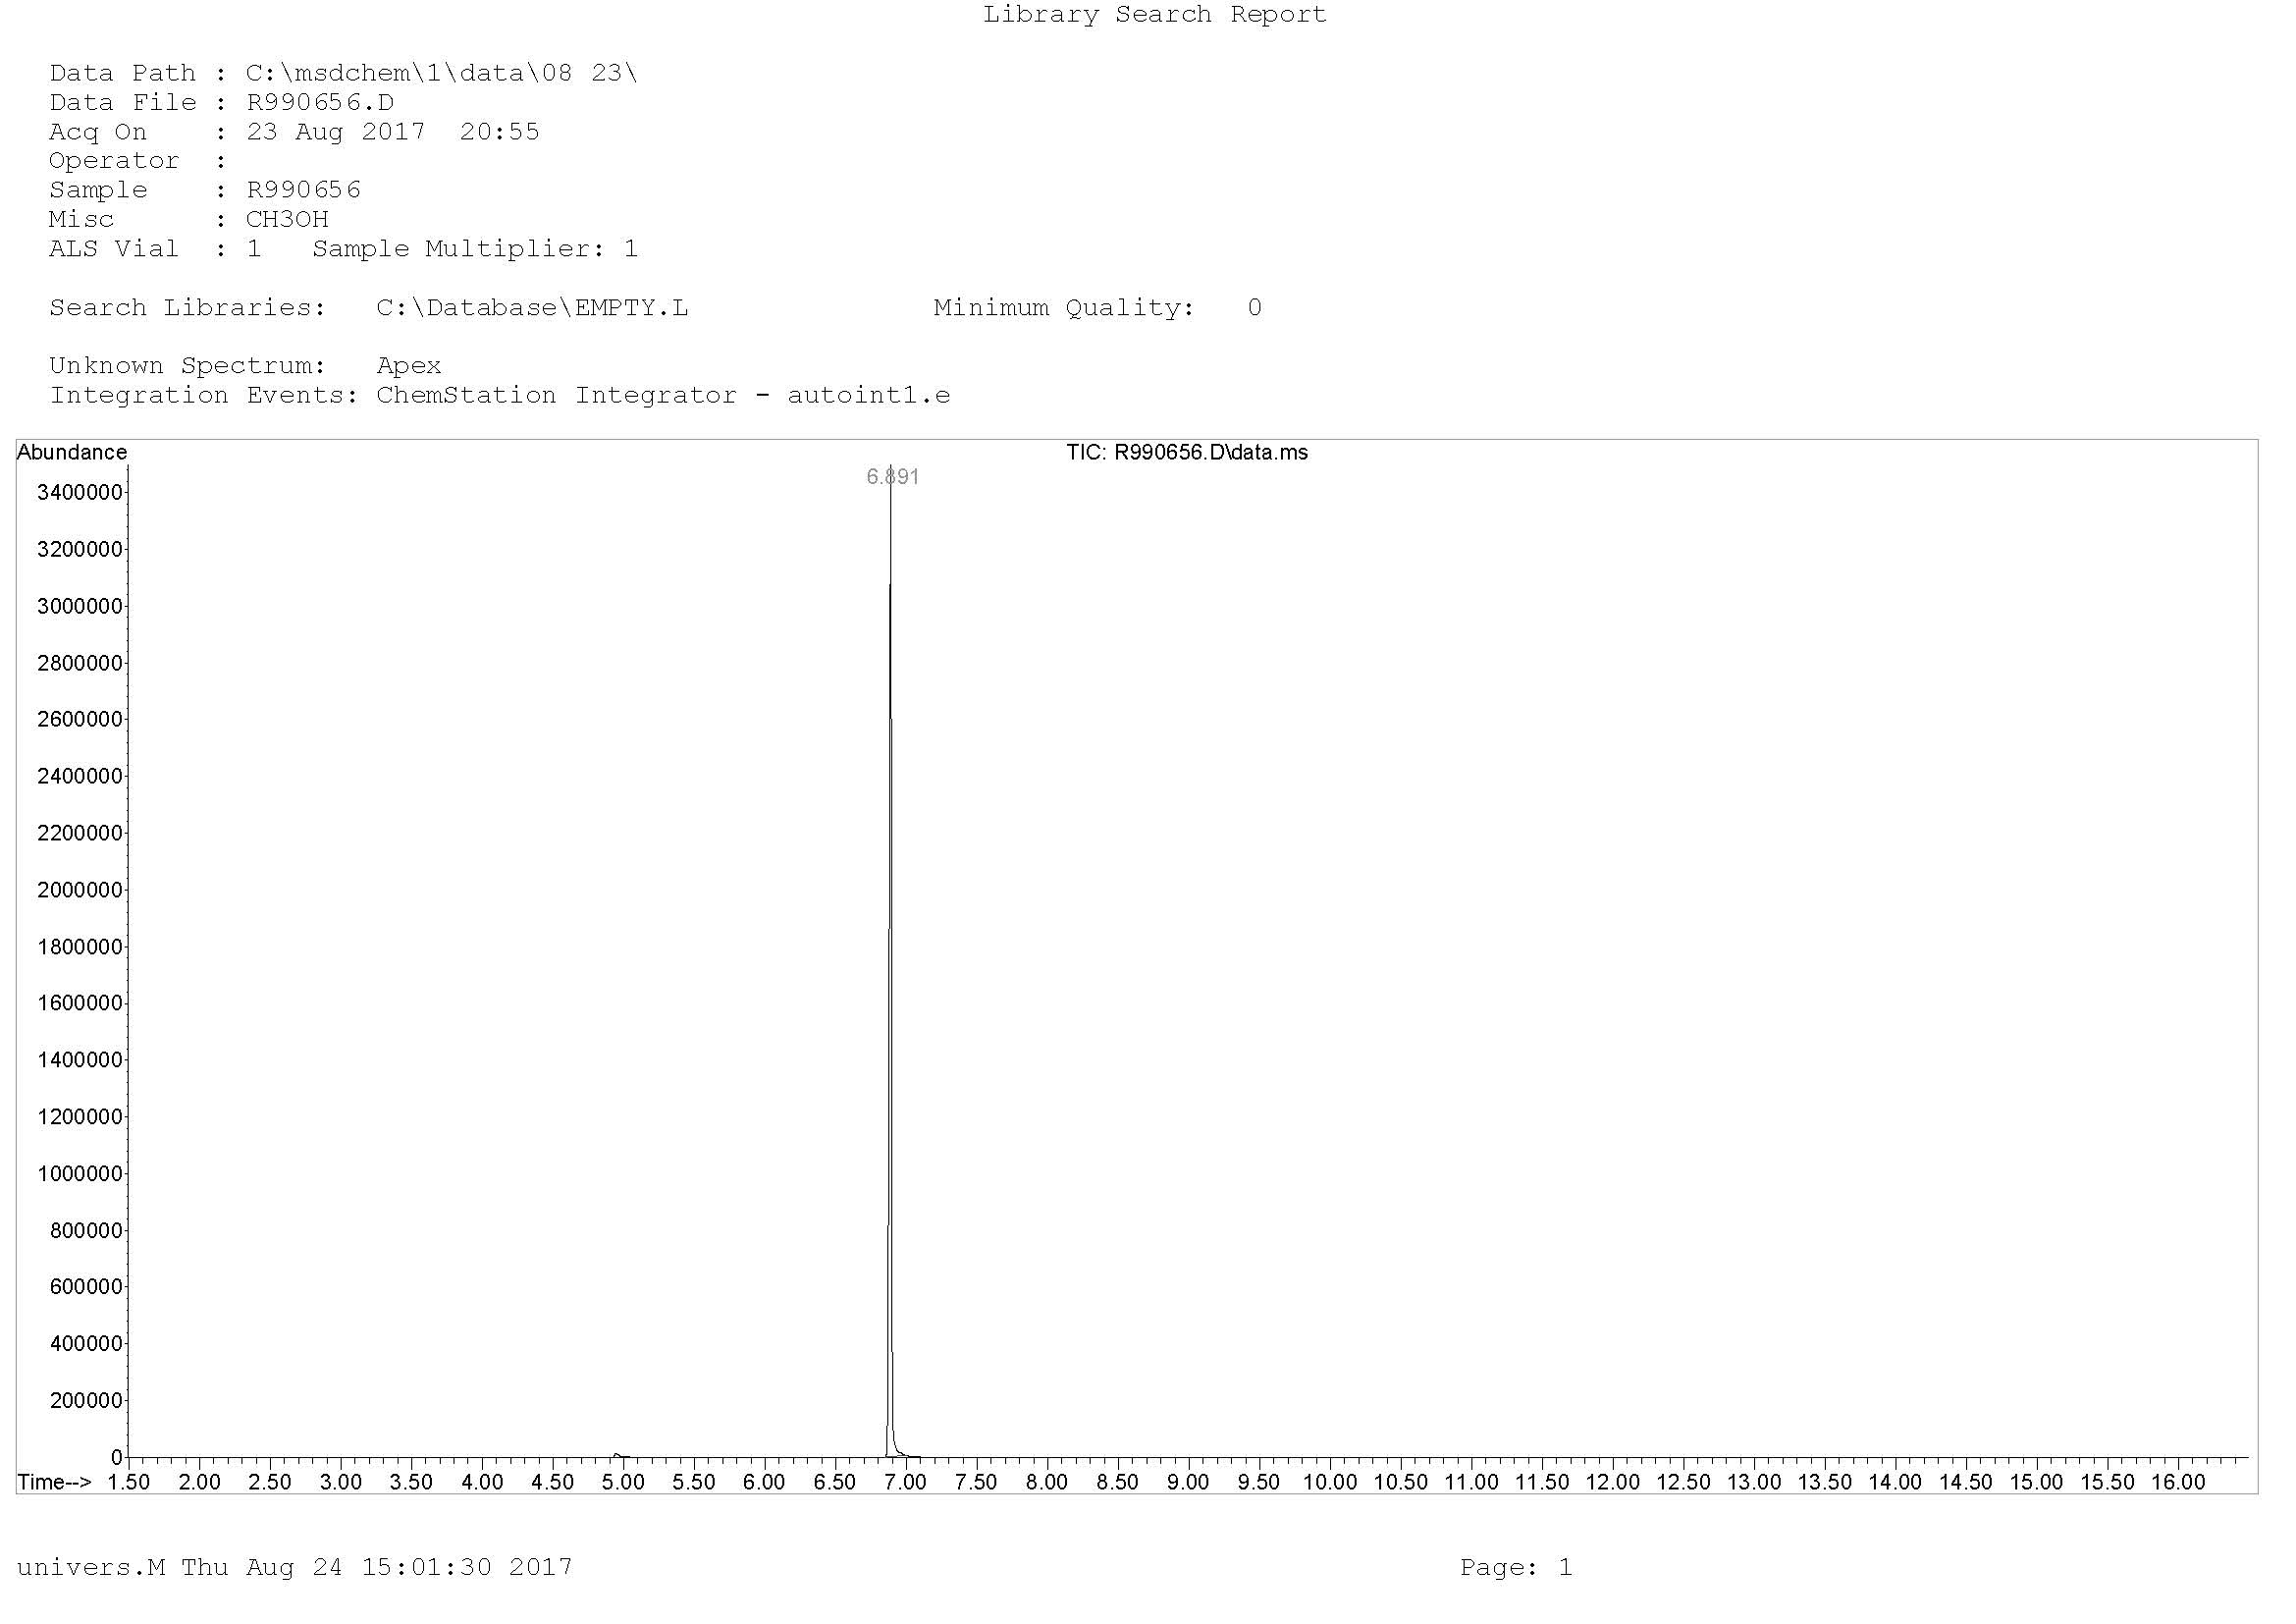


GS Chromatogramm of (1*R*,2*R*)-2-bromo-2,3-dihydro-1H-inden-1-ol


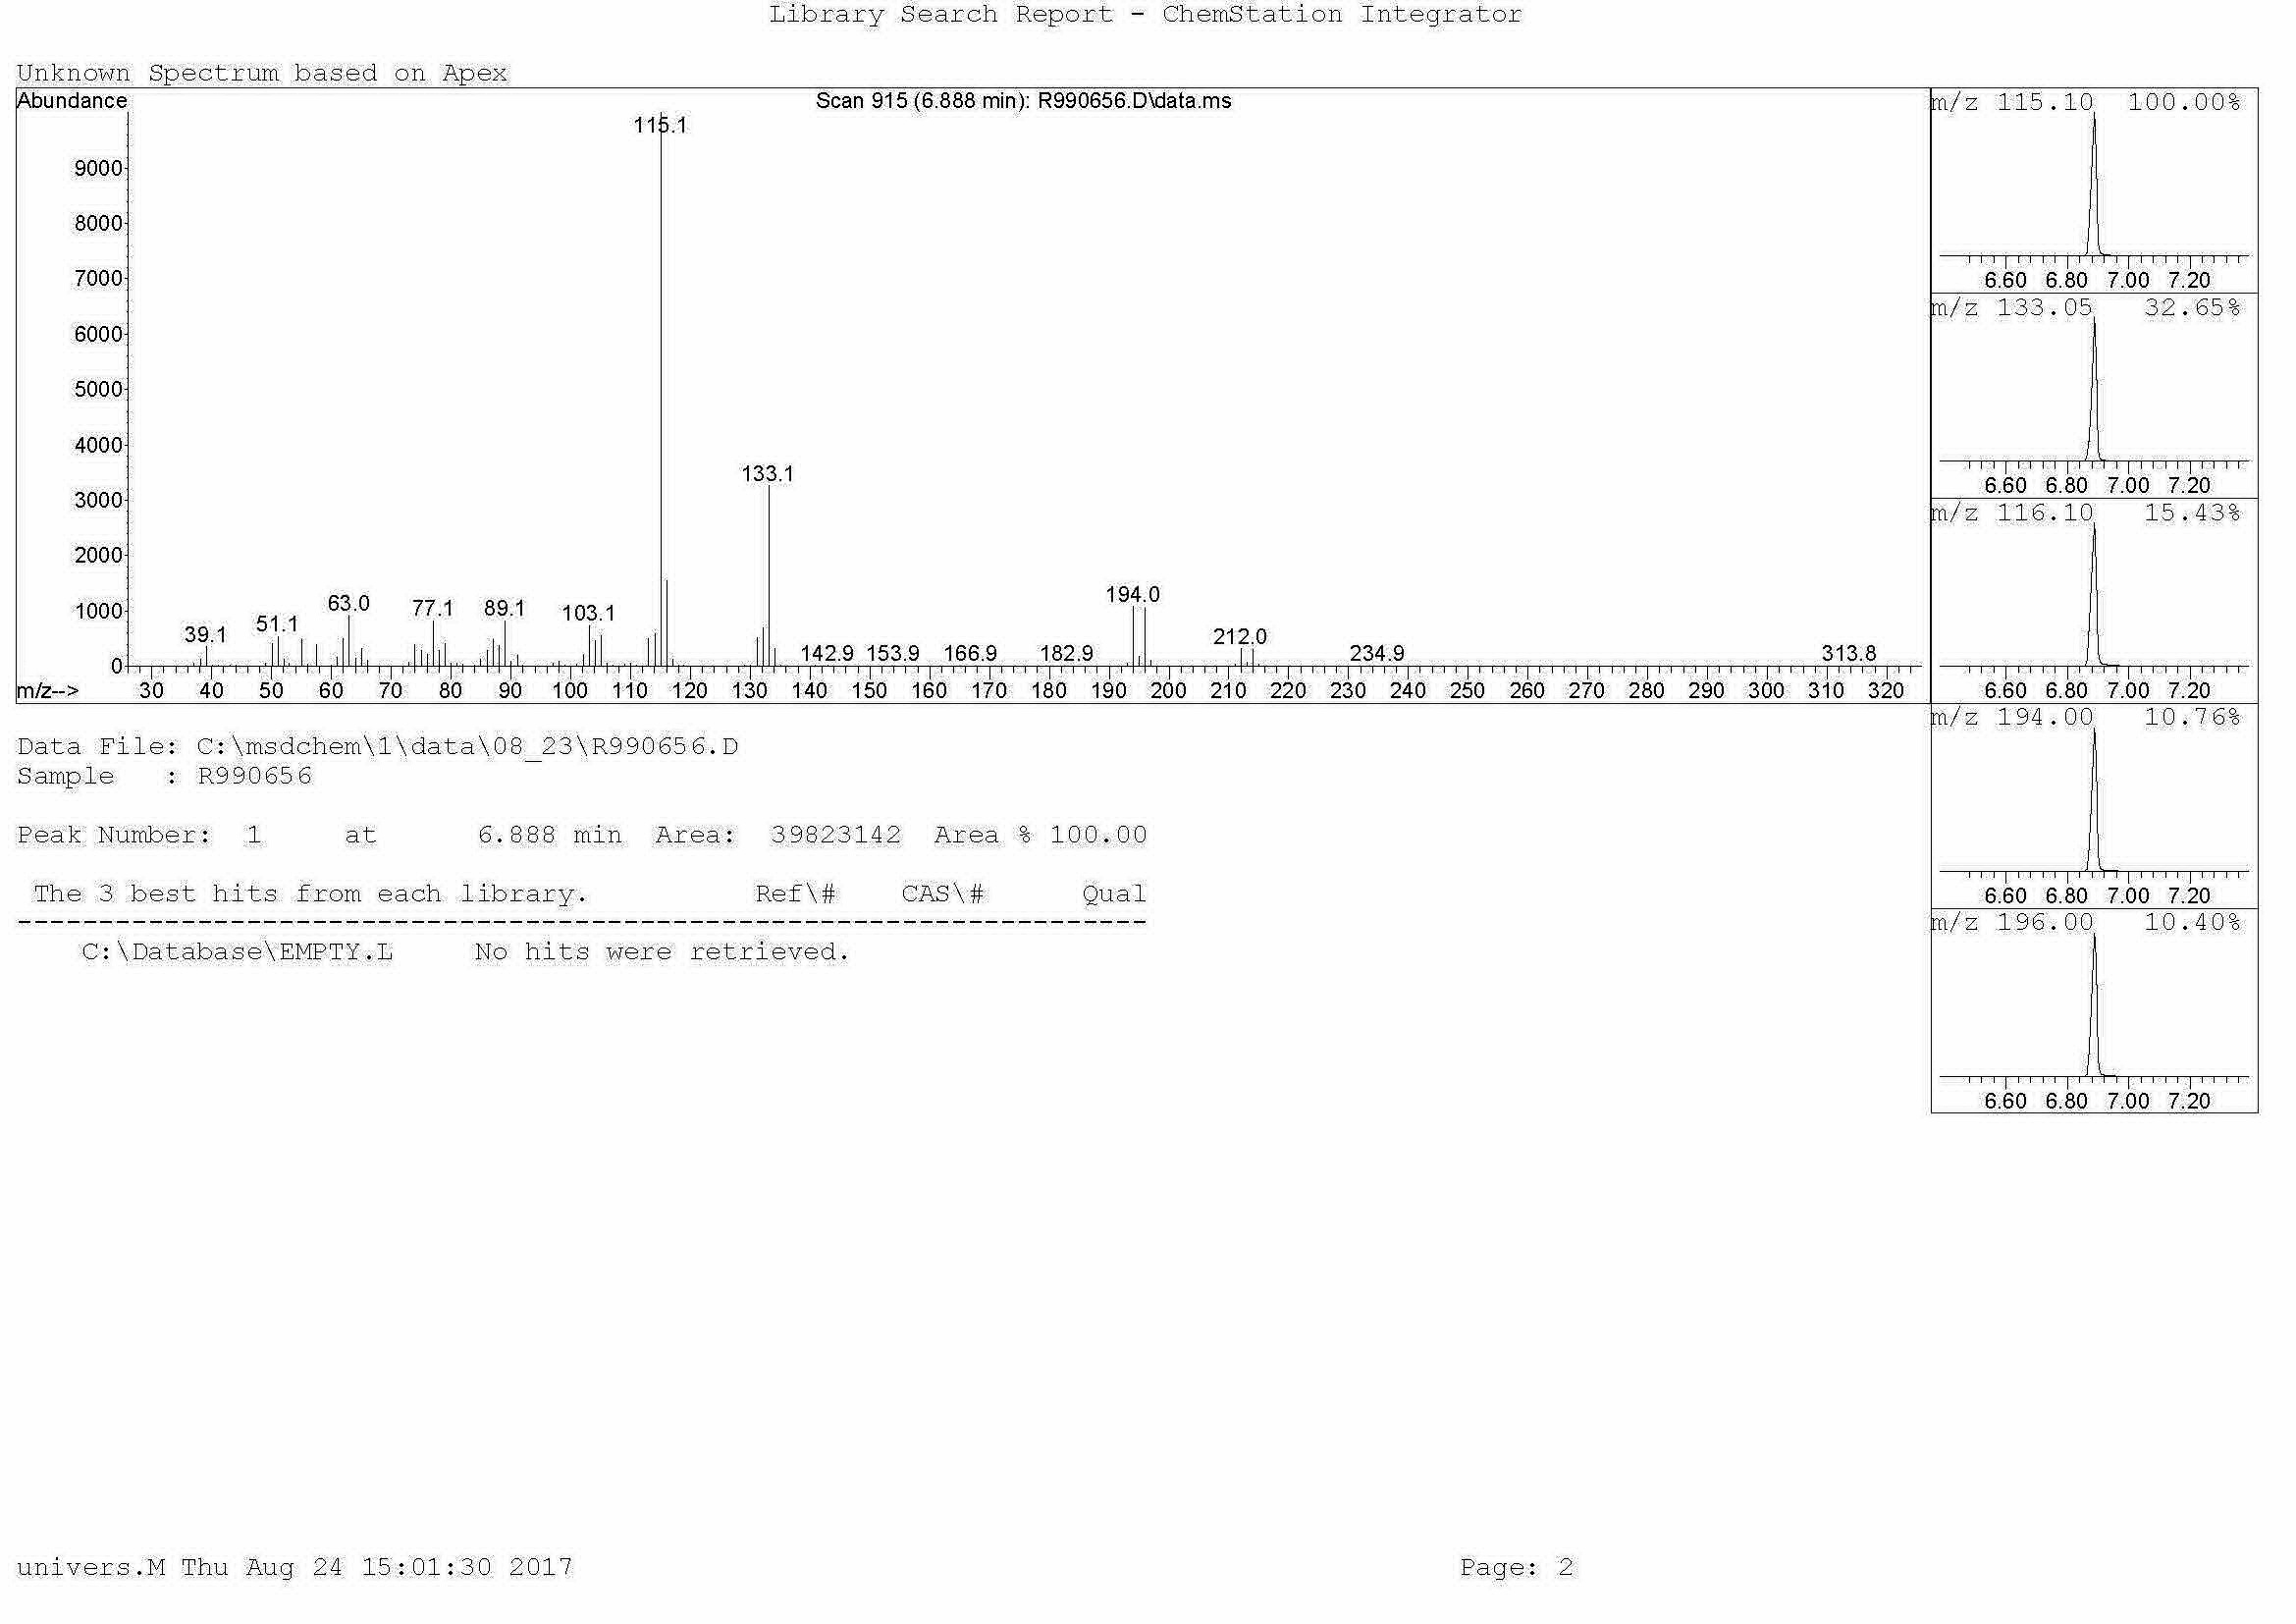


GC-MS of (1*R*,2*R*)- 2-bromo-2,3-dihydro-1H-inden-1-ol


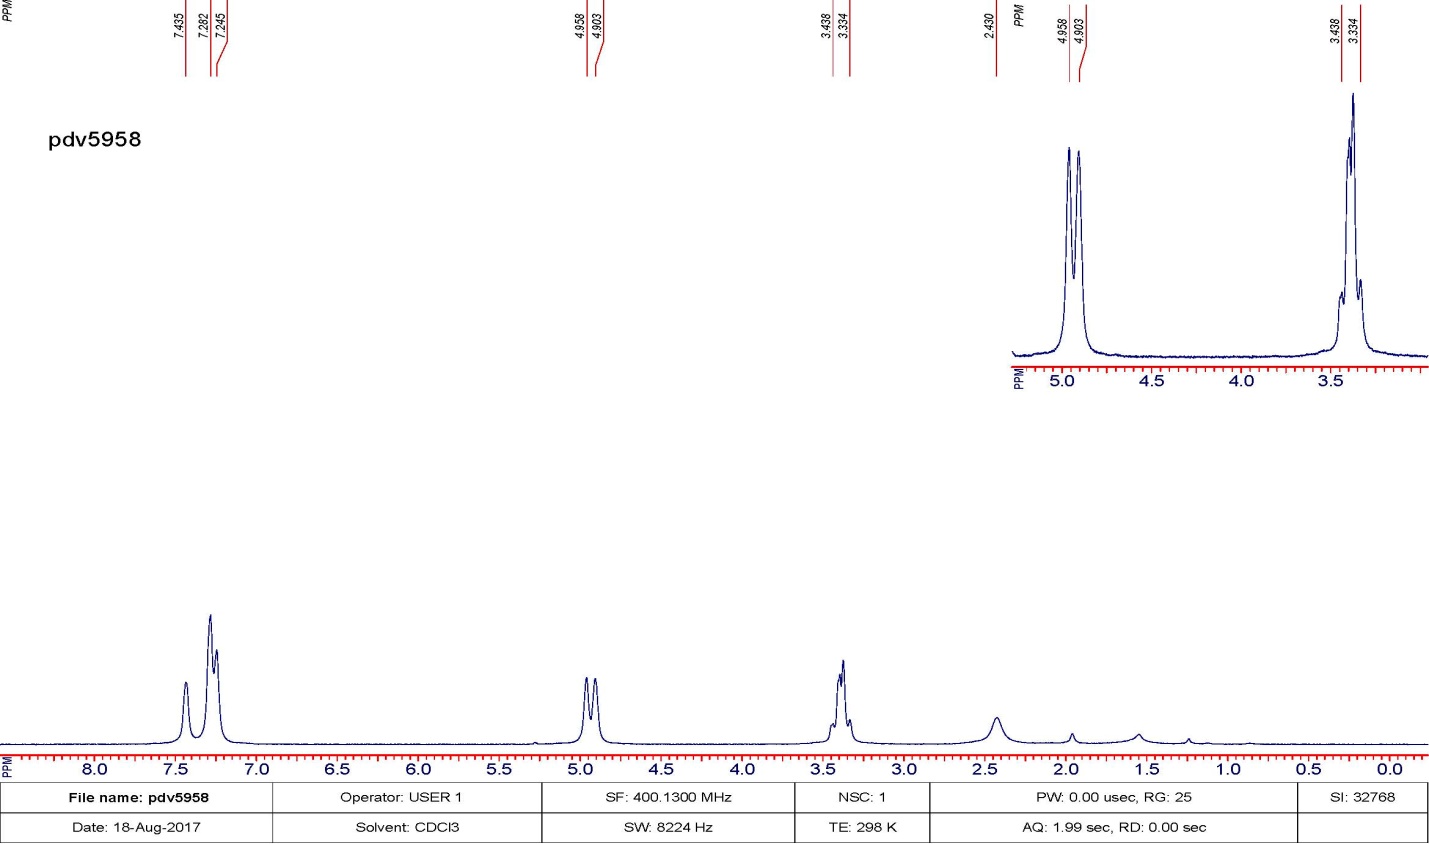


1H NMR Spectrum of (1*R*,*2S)*-2-bromo-2,3-dihydro-1H-inden-1-ol


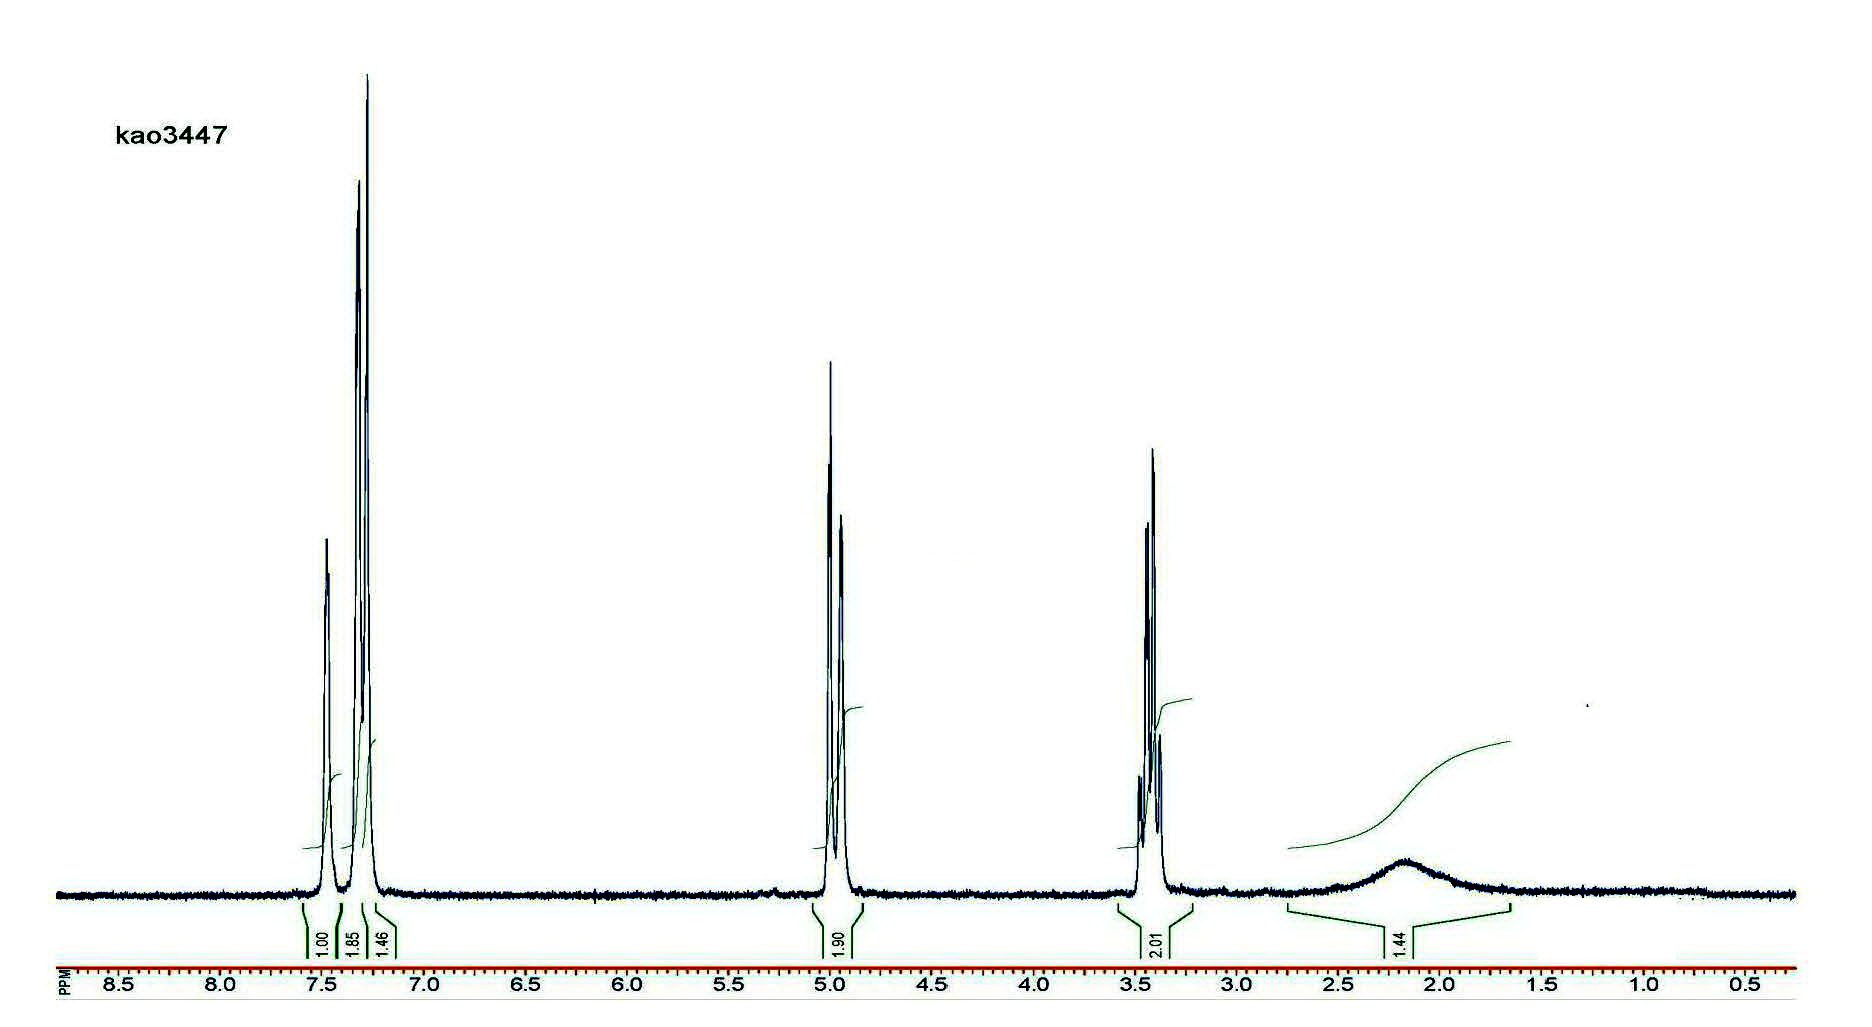


1H NMR Spectrum of 1*S*,*2R)*-2-bromo-2,3-dihydro-1H-inden-1-ol


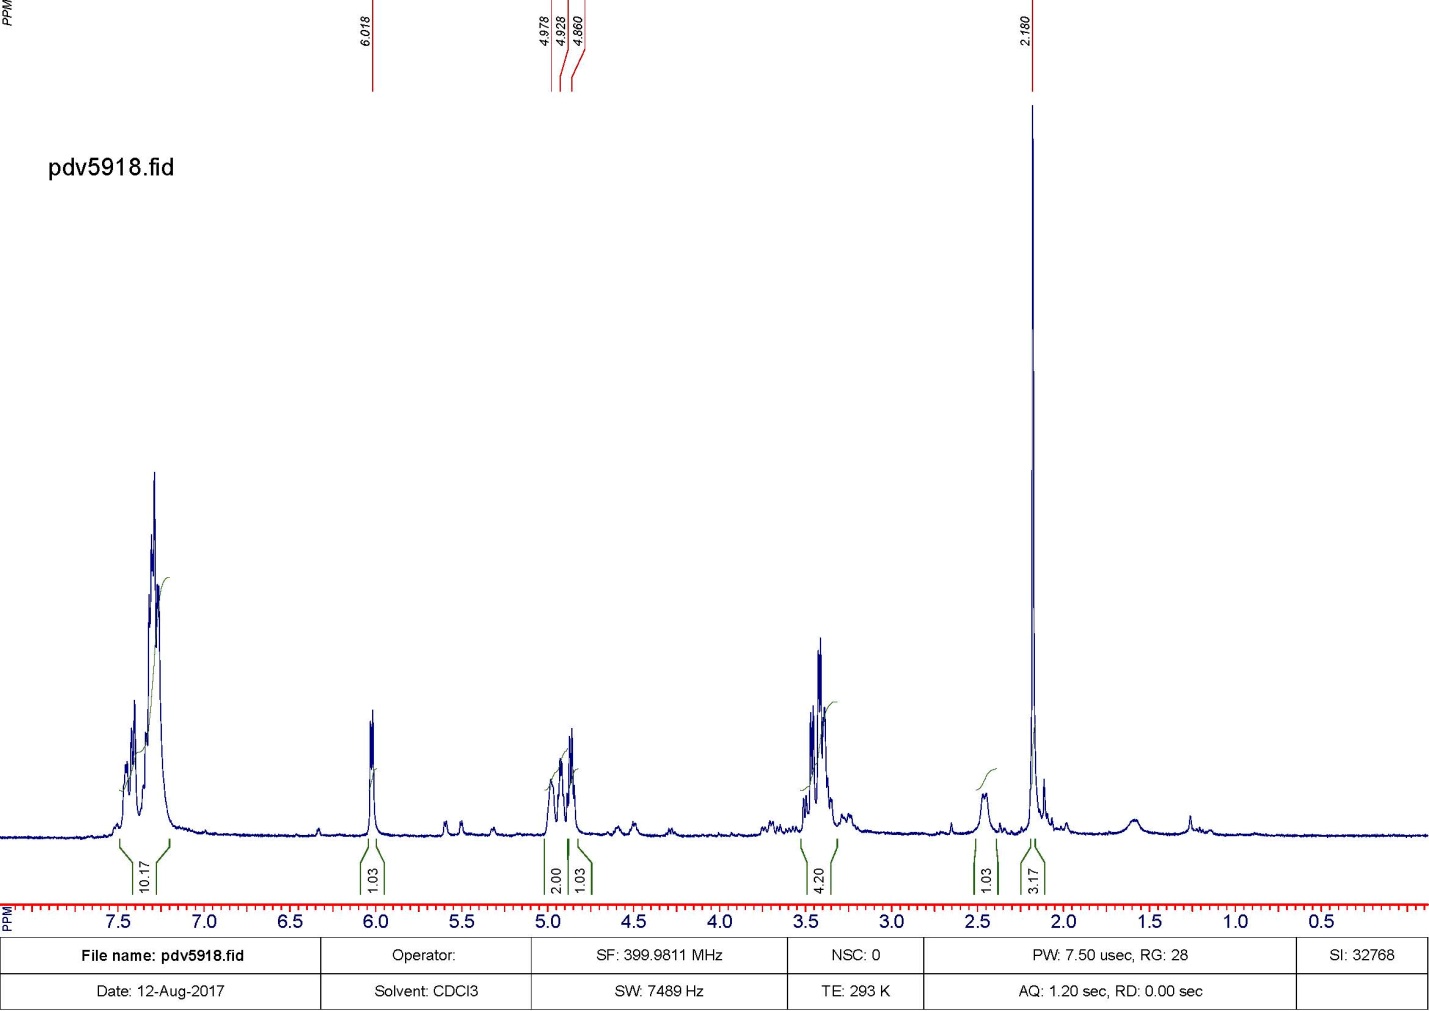


Resolved mixture of (1*R*,2*S*)-2-bromo-2,3-dihydro-1H-inden-1-yl acetate and (1*S*,2*R*)-2-bromo-2,3-dihydro-1H-inden-1-ol


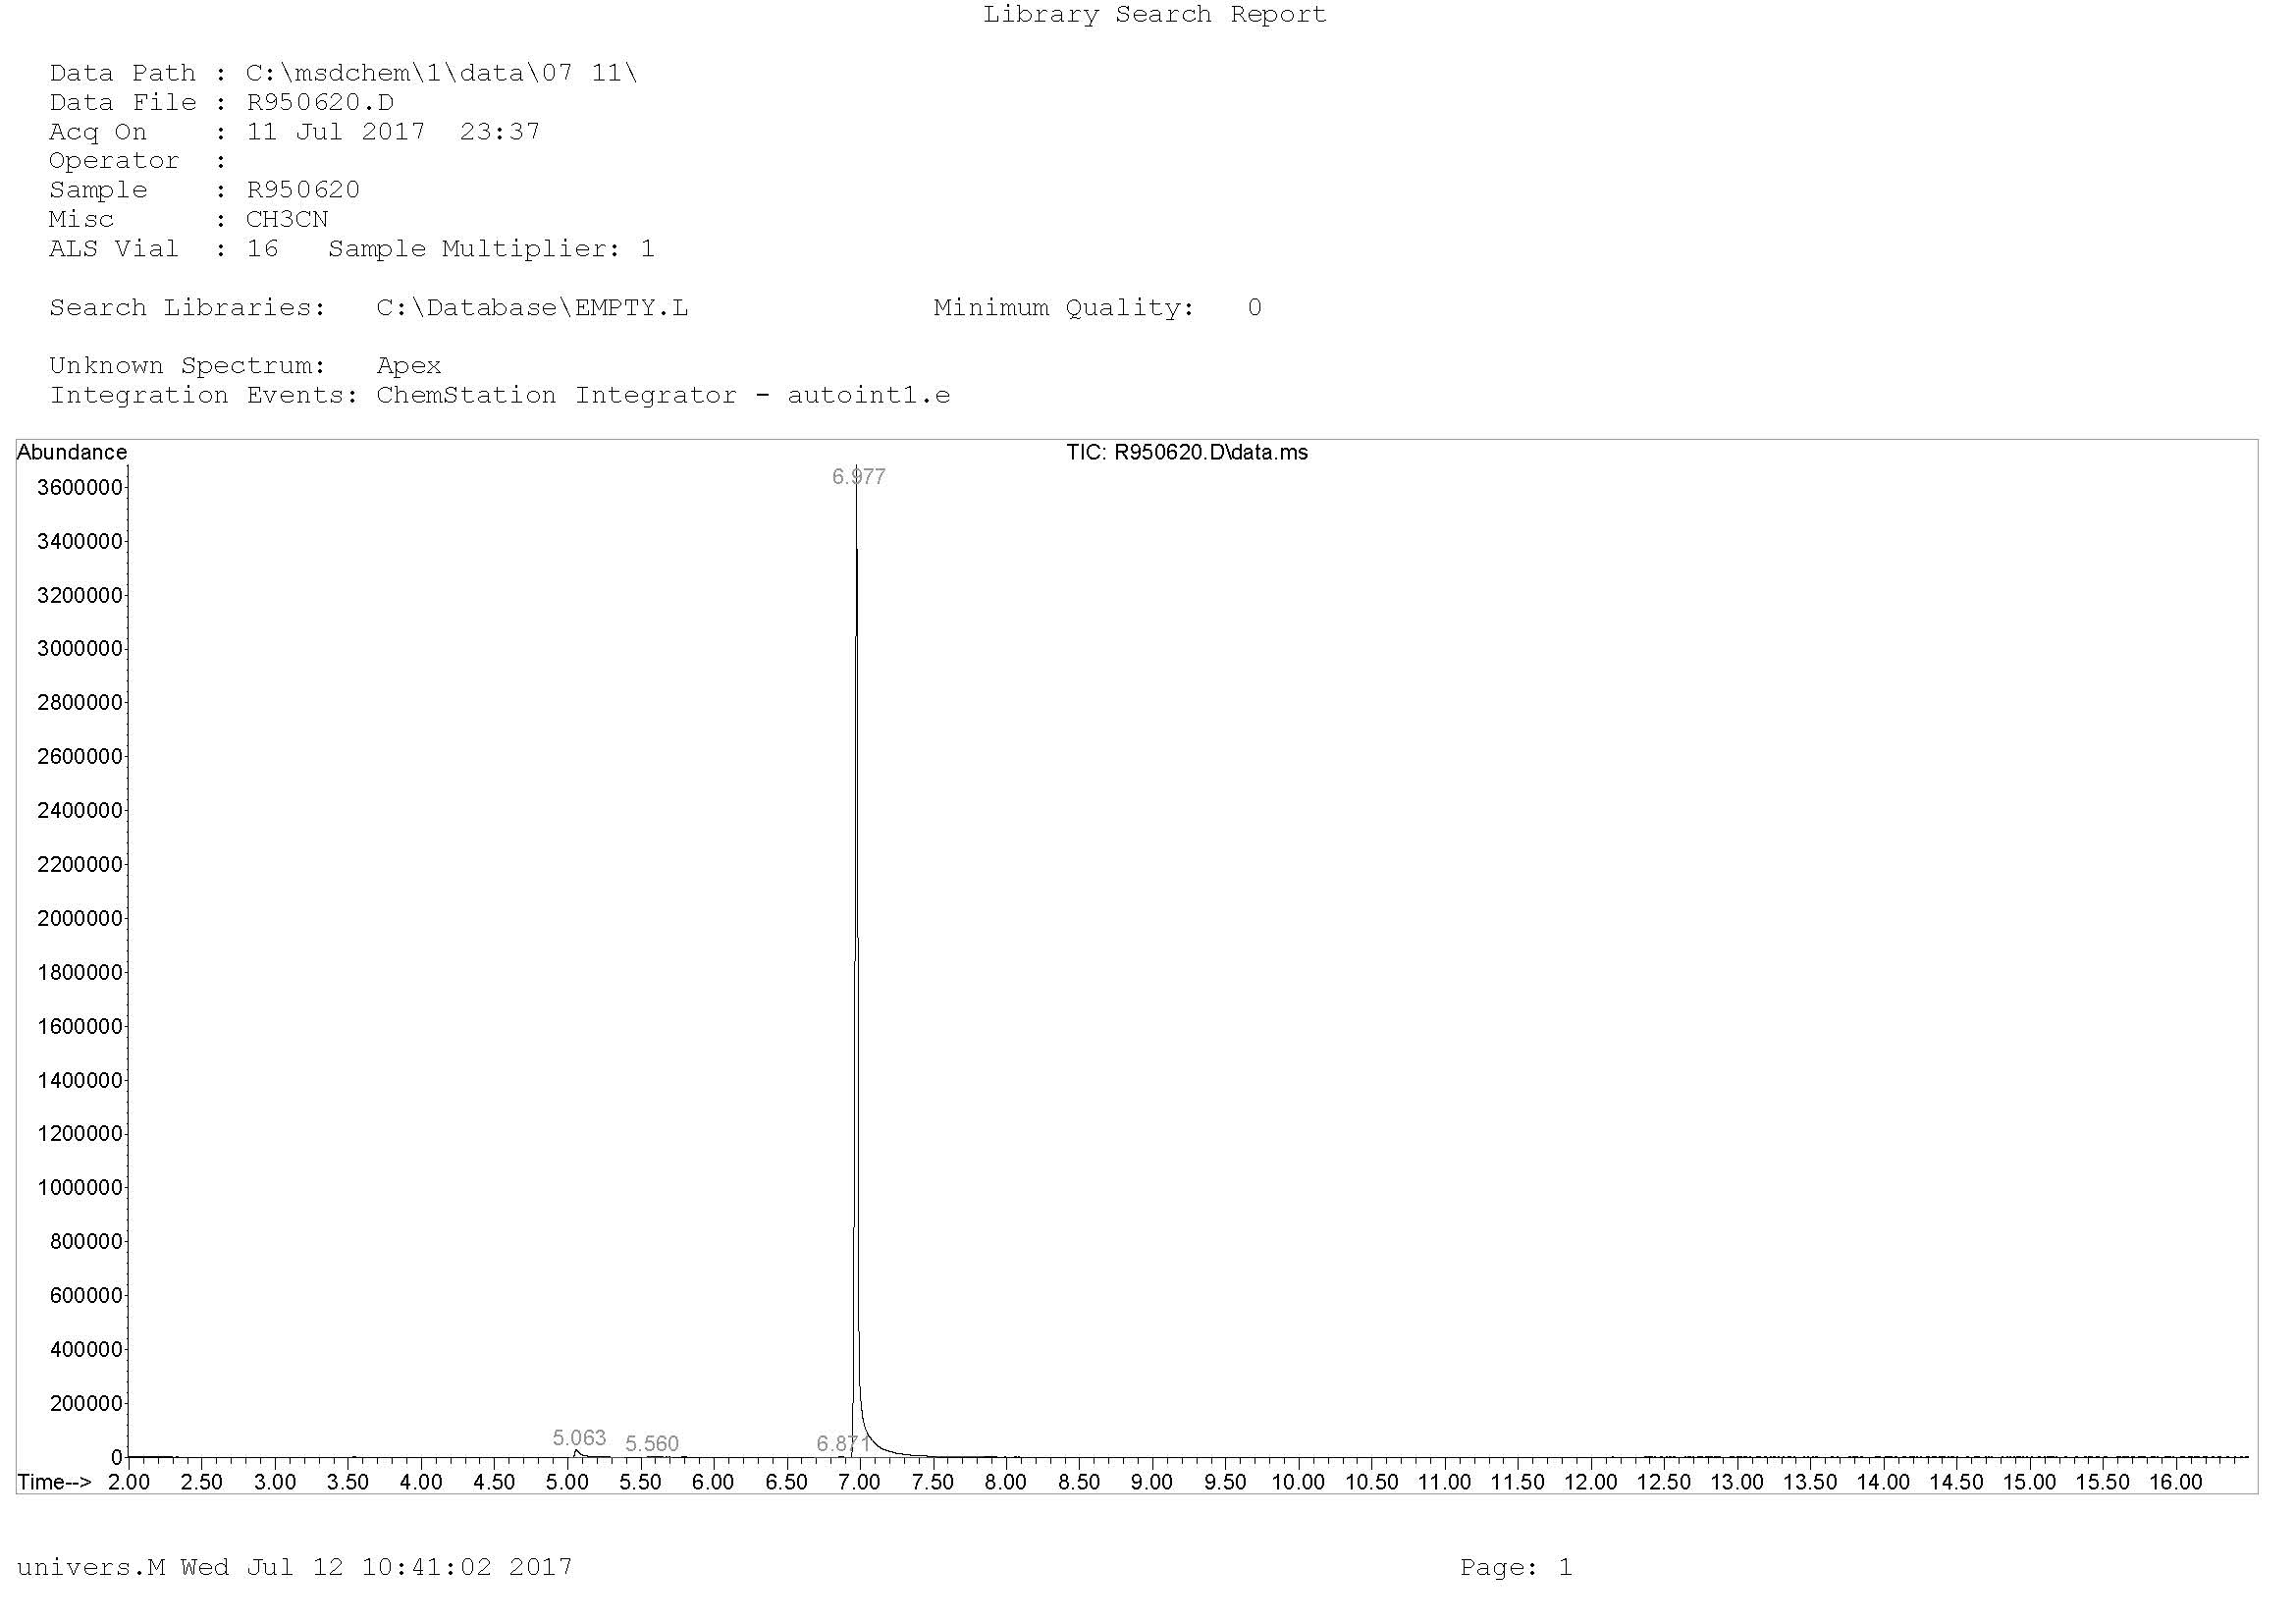


GC/MS of (1*R*,2*S*)-2-bromo-2,3-dihydro-1H-inden-1-ol


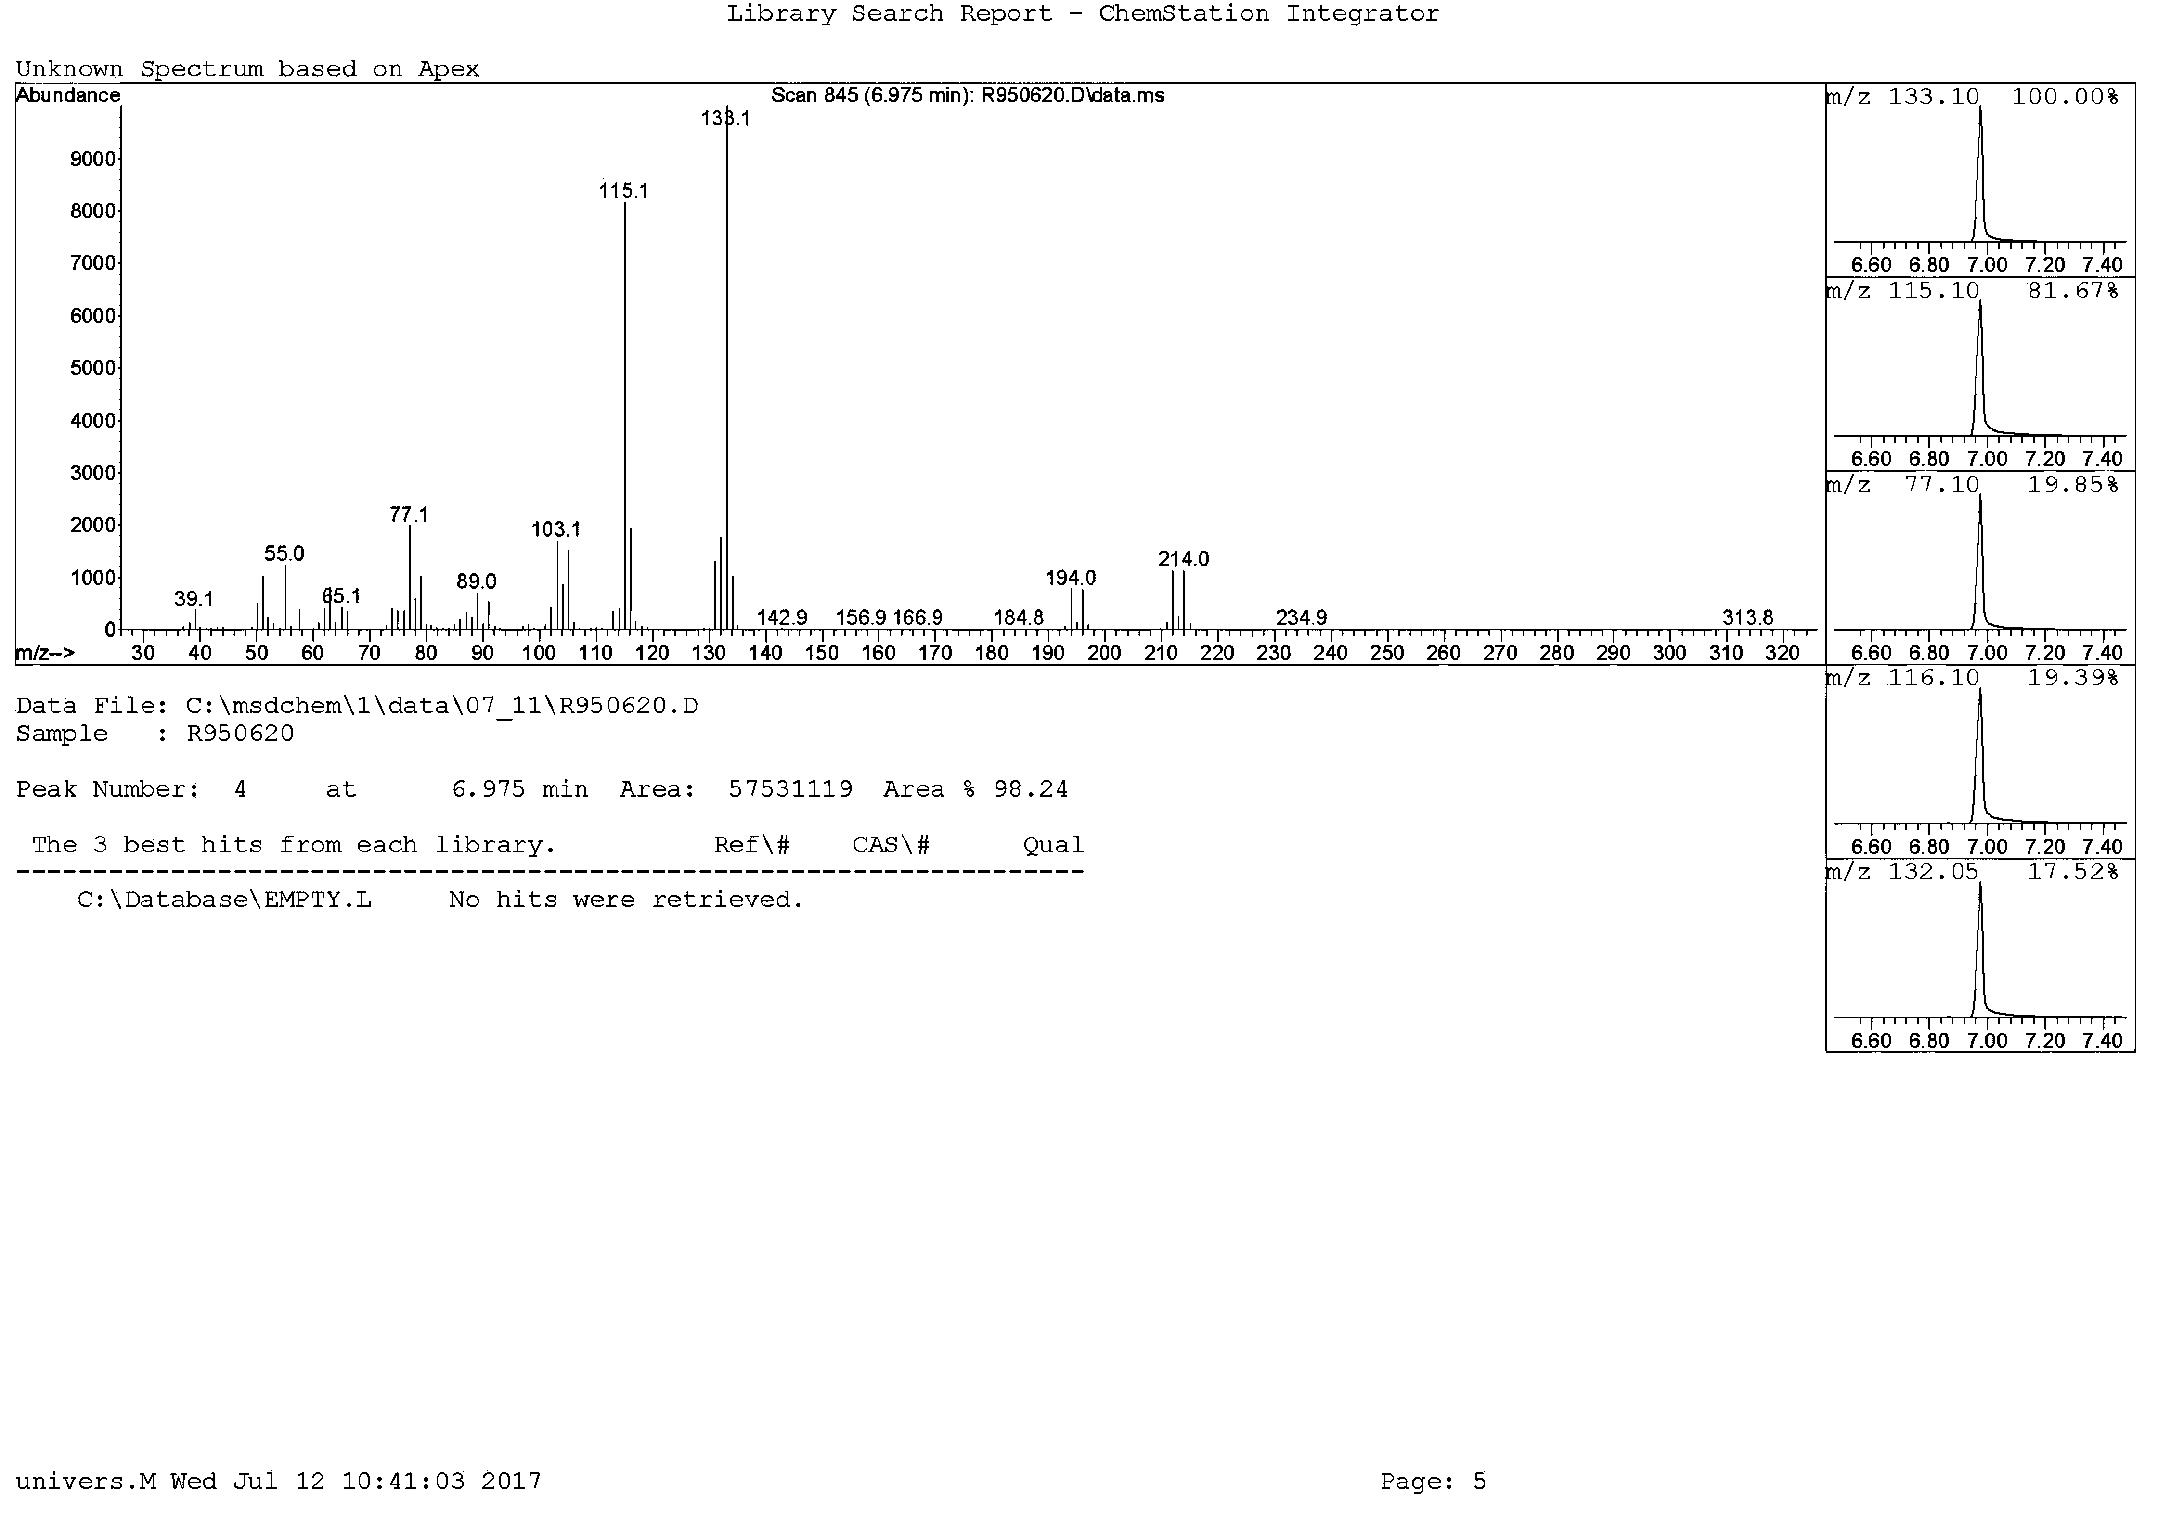


GC/MS of (1*R*,2*S*)-2-bromo-2,3-dihydro-1H-inden-1-ol


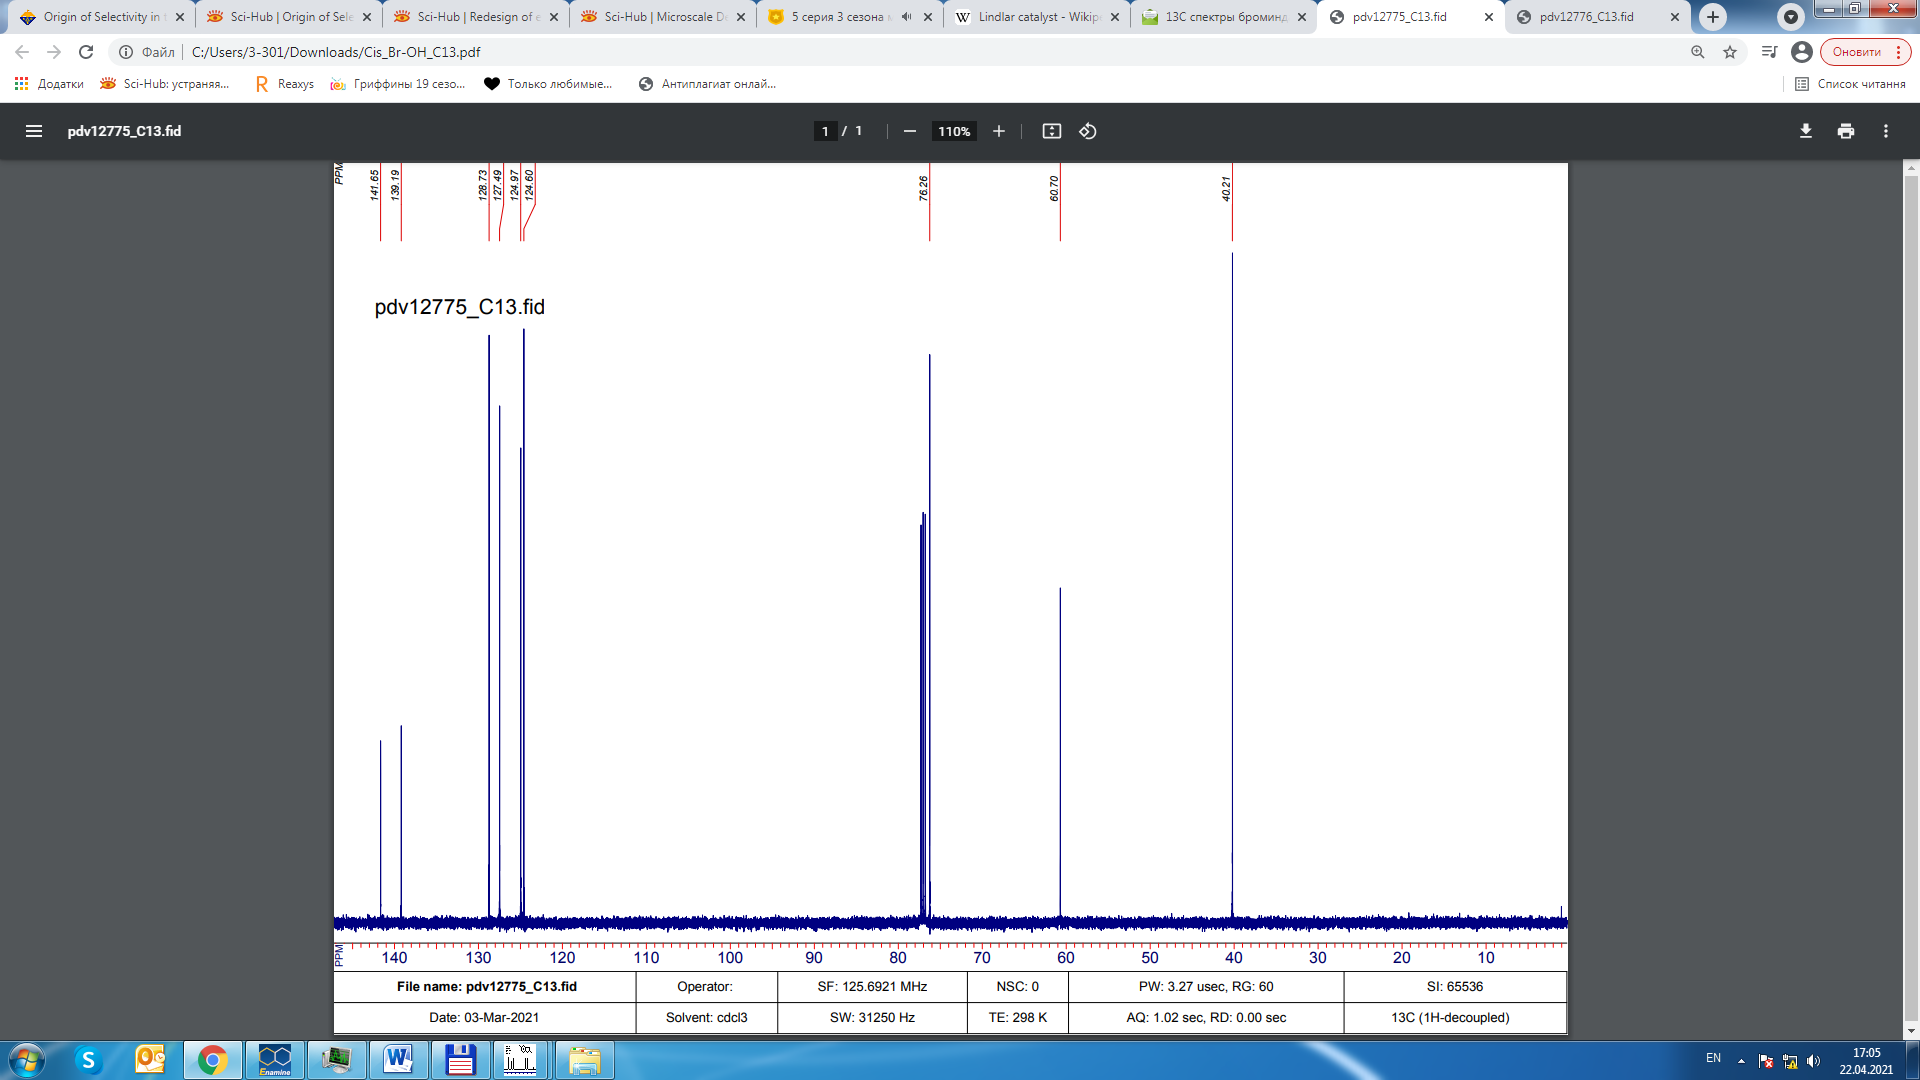


13C NMR spectrum of (127 MHz, CDCl3) of (1*R*,2*S*)-2-bromo-2,3-dihydro-1H-inden-1-ol

A B

Determination of optical purity of 2-bromo-2,3-dihydro-1H-inden-1-ol using its MTPA esters by 1H NMR Spectroscopy: A - racemate; B - (1*S*,2*R*)-stereoisomer

A B C

Determination of optical purity of chiral 2-bromo-2,3-dihydro-1H-inden-1-ol using the MTPA esters by 1H NMR Spectroscopy:

A - racemate; B - (1*S*,2*R*)-stereoisomer; C - (1*S*,2*R*)-stereoisomer

**References**

[1] Ros, A.; Magriz, A.; Dietrich, H.; Fernández, R.; Alvarez, E.; Lassaletta, J. M. Enantioselective Synthesis of Vicinal Halohydrins via Dynamic Kinetic Resolution *Org. Lett.* **2006**, 8, 1, 127–130.

[2] Cho, O. K.; Cho, B. T. A convenient synthesis of (1*S*,2*R*)-1,2-indene oxide and *trans-*(1*S*,2*S*)-2-bromo-1-indanol via oxazaborolidine-catalyzed borane reduction. *Tetrahedron: Asymmetry* **2001**, *12*, 903–907.

[3] Igarashi, Y., Otsutomo, S., Harada, M., Nakano, S., Watanabe, S. Lipase-mediated resolution of indene bromohydrin. *Synthesis* 1**997**, 5, 549–552.

[4] Austin, R.; Lillya, P. Conformations of 1,2-Disubstituted Indans. Electronegativity Corrections to Nuclear Magnetic Resonance Coupling Constants. *J. Org. Chem.* **1969**, *34*, 1327-1333.

[5] Aleu, J.; Fronza, G.; Fuganti, C.; Perozzo, V.;Serra, S. On the baker’s yeast mediated transformation of bromoenones. Synthesis of (lS,2*S*)-2-bromoindan-l-ol and (2S,3S)-3-bromo-4-phenylbutan-2-ol. *Tetrahedron: Asymmetry* **1998**, *9*, 1589–1596.

[6] Boyd, D. R.; Sharma, N. D.; Smith, A. E. Chemical Synthesis and Optical Purity Determination of Optically Active I ,2-Epoxyindan and Alcohol Products which are also derived from Mammalian or Microbial Metabolism of lndene or lndanones *J. Chem. Soc., Perkin Trans.* 1, **1982**, 2767–2770.
